1 **Bi-directional encoding of context-based odor signals and behavioral states by**  
2 **the nucleus of the lateral olfactory tract neurons**

3 **Short title**

4 Bi-directional odor-outcome encodings in the nLOT

5  
6 **Authors**

7 Yuta Tanisumi<sup>1,2, †</sup>, Kazuki Shiotani<sup>1,2, †</sup>, Junya Hirokawa<sup>1</sup>, Yoshio Sakurai<sup>1</sup> and Hiroyuki Manabe<sup>1</sup>

8  
9 **Affiliations**

10 <sup>1</sup> Laboratory of Neural Information, Graduate School of Brain Science, Doshisha University, Kyoto,  
11 Japan.

12 <sup>2</sup> Research Fellow of the Japan Society for the Promotion of Science, Tokyo, Japan.

13 †These authors contributed equally to this work.

14  
15 **Corresponding author:**

16 Hiroyuki Manabe, Ph.D.

17 Laboratory of Neural Information, Graduate School of Brain Science, Doshisha University, Kyoto,  
18 Japan.

19 Phone: +81-774-65-7181

20 Email: hmanabe@mail.doshisha.ac.jp

21

22

23

24

25

## 26 **Abstract**

27 The nucleus of the lateral olfactory tract (nLOT) is not only a part of the olfactory cortex that  
28 receives olfactory sensory inputs from the olfactory bulb, but also one of the cortical amygdala  
29 areas that regulates motivational behaviors. To examine how the neural ensemble activity of the  
30 nLOT is modulated by motivational processes that occur during various states of learned goal-  
31 directed behaviors, we recorded nLOT spike activities of mice performing odor-guided go/no-go  
32 tasks for obtaining a water reward. We found that the majority of the nLOT neurons exhibited sharp  
33 go-cue excitation and persistent no-go-cue inhibition responses triggered by an odor onset. The bi-  
34 directional cue encoding introduced nLOT population response dynamics and provided a high odor  
35 decoding accuracy before executing cue-odor-evoked behaviors. The go-cue preferred neurons  
36 were also activated in the reward drinking state, indicating context-based odor-outcome  
37 associations. These findings suggest that the nLOT neurons play an important role in the translation  
38 from context-based odor information to appropriate behavioral motivation.

39

40

## 41 **MAIN TEXT**

42

### 43 **Introduction**

44 The nucleus of the lateral olfactory tract (nLOT) is a part of the olfactory cortex that receives direct  
45 sensory inputs from the olfactory bulb and the olfactory cortex, such as the piriform cortex (1, 2).  
46 Alternately, it also receives projections from the anterior amygdaloid area, anterior cortical and  
47 posterolateral cortical amygdaloid nuclei, and amygdalo-piriform transition area, and forms part of  
48 the olfactory amygdala (3). While some authors have considered the nLOT as a component of the  
49 olfactory cortex (1, 4), others have regarded it as a component of the cortical amygdala areas that  
50 plays a critical role in generating odor-driven behaviors (5). The nLOT not only has bi-directional

51 connection with the olfactory bulb and piriform cortex, but also strongly innervates the basolateral  
52 amygdala and ventral striatum (1, 2, 6). Due to its anatomical features, it is possible that the nLOT  
53 is involved in odor-evoked motivational behaviors.

54 In addition to these anatomical evidences, a recent study (7) showed functional evidence  
55 that nLOT integrity was required for the normal functioning of the olfactory system. The  
56 researchers conducted a series of behavioral tests using rats that were submitted to bilateral  
57 excitotoxic lesions of the nLOT. The nLOT-lesioned rats exhibited severe olfactory deficits with  
58 an inability to detect and discriminate between odors.

59 Despite the accumulation of knowledge, there are no reports of the *in vivo* recording of  
60 neuronal activity in the nLOT; therefore, the electrophysiological features of the nLOT neurons on  
61 odor-evoked motivational behavior have not been clarified. The purpose of our study was to  
62 investigate how the neural activity was modulated by motivational processes that occurred during  
63 various behavioral states in a goal-directed task. Here, we recorded the neural spike activities in the  
64 nLOT of freely moving mice performing an odor-guided go/no-go task. We found that the majority  
65 of nLOT neurons exhibited go-cue excitation and no-go-cue inhibition responses triggered by an  
66 odor onset. The bi-directional cue encoding strongly contributed to the nLOT neuron population  
67 dynamics before executing cue-odor-evoked behaviors; additionally, the go-cue preferred neurons  
68 encoded reward drinking state, indicating context-based odor-outcome associations. Our results  
69 suggest that the nLOT is critical for encoding context-based cue-outcome signals, and may play an  
70 important role in the translation of odor stimulus information to odor-guided behavioral motivation.

71

72

## 73 **Results**

74 We recorded from 365 well-isolated neurons in the nLOT of four mice performing odor-guided  
75 go/no-go tasks (Figs. 1A and 1B). Briefly, the go trial required the mice to first sample a go-cue

76 odor stimulus presented at an odor port and then to move to a reward port for obtaining a water  
77 reward. Conversely, the no-go trial required the mice to first sample a no-go-cue odor stimulus  
78 presented at the odor port and then to stay near it to wait for the next trial. It is important to note  
79 that the mice were required to keep their nose inserted into the odor port during odor presentation  
80 (500 msec). For all mice, the median of the odor-sampling epoch (the time from the odor valve  
81 opening until the withdrawal of the snout by the mouse from the odor port) was 788 msec  
82 (interquartile range: 669–962 msec) in the go trials, and 642 msec (interquartile range: 562–798  
83 msec) in the no-go trials (44 sessions from four mice). In the following sections, we describe our  
84 analyses of the neural activity recorded during odor-sampling and the following odor-guided  
85 behaviors.

86

### 87 **The five-type classification of nLOT neurons based on the odor-sampling epoch response**

88 As the nLOT receives direct inputs from the mitral cells of the olfactory bulb, we first focused on  
89 the neural activity during the odor-sampling epoch. We found that the firing rates of the nLOT  
90 neurons increased or decreased during the odor-sampling epoch. For a large subset of the neurons,  
91 these firing rate changes depended on whether the presented odor was go-cue or no-go-cue  
92 (examples shown in Fig. 1C, left). In order to quantify the dependence of the firing rate on cue odor  
93 presentation, we used a receiver operating characteristic (ROC) analysis approach. We calculated  
94 the firing rate changes from baseline (1,000 to 0 msec before the end of the inter-trial interval)  
95 during the odor-sampling epoch. Across the population, 73.2% of the nLOT neurons exhibited  
96 significant responses for at least one of the cue odor presentations (Fig. S1,  $p < 0.01$ , permutation  
97 test). In this cue odor selective population, we also calculated the preference for go-cue and no-go-  
98 cue odor presentation. We observed that 53.2% of the population showed a significant go-cue odor  
99 preference, whereas 7.9% of them showed a significant no-go-cue odor preference (Fig. S1,  $p <$   
100 0.01, permutation test). The other population exhibited increased or decreased responses to both

101 go-cue and no-go-cue odor presentations. Thus, most of the nLOT neurons showed a wide variety  
102 of firing rate changes during an odor-sampling epoch.

103       Based on these response profiles of odor-sampling epoch, we classified the nLOT neurons  
104 into five types (Figs. 1C and S1, Table 1, see Materials and methods). The first neuron group (type  
105 I, 38.9% of all neurons) exhibited significant preference for the presented go-cue odor—we will  
106 refer to these as “go-cue preferred neurons” (purple pie chart in Figs. 1C and S1). The second  
107 neuron group (type II, 5.8% of all neurons) exhibited significant preference for the presented no-  
108 go-cue odor—we will refer to these as “no-go-cue preferred neurons” (orange pie chart in Figs. 1C  
109 and S1). Two other neuron groups (type III and IV, 11.5% and 17.0% of all neurons) showed  
110 significant excitatory and inhibitory responses, respectively, for both presented cue odors without  
111 preference for a particular cue odor; we will refer to these as “cue excitatory neurons” (pink pie  
112 chart in Figs. 1C and S1) and “cue inhibitory neurons” (light blue pie chart in Figs. 1C and S1),  
113 respectively. The remaining neuron group (type V, 26.8% of all neurons) did not show significant  
114 responses for either presented cue odors—we will refer to these as “cue non-selective neurons”  
115 (gray pie chart in Figs. 1C and S1). This classification demonstrated the diverse cue encoding  
116 patterns in the nLOT, suggesting that the nLOT neurons do not represent a particular odorant profile  
117 from the olfactory bulb, and instead represent the complex and diverse odor information leading to  
118 odor-guided behaviors.

119

## 120 **Go-Cue preferred neurons bi-directionally encode cue odors with excitations and inhibitions**

121 Among the go-cue preferred neurons (type I neurons,  $n = 142$ ), which represent the major  
122 population of the nLOT neurons (Fig. 1C), each neuron showed a sharp peak in the firing rate after  
123 ~600 msec of go-cue odor presentation and persistent inhibition during the latter part of the no-go-  
124 cue odor sampling epoch (Fig. 2A). To quantify the dynamics of this bi-directional cue encoding,  
125 we calculated the firing rate changes from the baseline (200 to 0 msec before the end of the inter

126 trial interval) in the sliding bins during the odor-sampling epoch for each neuron. For each accurate  
127 trial type, we calculated the area under the ROC curve (auROC) value at each time bin (width: 100  
128 msec, step: 20 msec) (Figs. 2B and 2C), and three measures from the auROC values: “onset time,”  
129 “time of center of mass,” and “duration” (Fig. 2D, see Materials and methods). The onset times of  
130 the go-cue excitations were earlier than those of no-go-cue inhibitions ( $p < 10^{-4}$ , Wilcoxon rank-  
131 sum test). Regarding the times of the center of mass and durations, the go-cue excitation responses  
132 were earlier ( $p < 10^{-23}$ , Wilcoxon rank-sum test) and sharper ( $p < 0.05$ , Wilcoxon rank-sum test)  
133 than the no-go-cue inhibition responses. Conversely, the no-go-cue inhibition responses were  
134 sustained until the mice withdrew their snouts from the odor port. For each neuron, both the go-cue  
135 excitation response and the no-go-cue inhibition response were significantly observed particularly  
136 450–550 msec after the odor onset (Figs 2E and S2,  $p < 0.01$ , permutation test). Thus, each go-cue  
137 preferred neuron exhibited both a sharp go-cue excitation and a persistent no-go-cue inhibition at  
138 the specific times during the odor-sampling epoch.

139         It is possible that the sharp go-cue excitation responses correlated with the executions of  
140 the go behaviors. To verify this possibility, we compared the peak firing rates and the half width of  
141 firing in the go-cue excitation between the two alignment conditions (odor valve opening versus  
142 odor port exit). We observed that the peak firing rates were higher relative to the odor onset ( $p <$   
143  $10^{-15}$ , Wilcoxon signed-rank test) and the temporal organizations were significantly tighter ( $p <$   
144  $0.001$ , Wilcoxon signed-rank test) than the firing rate relative to the odor port exit (Figs. S3A-B).  
145 These results indicated that the go-cue excitation responses of the go-cue preferred neurons were  
146 triggered by odor onset rather than execution of the go behavior. Furthermore, the distinct cue  
147 responses were observed in the correct go trials, and not in the trials that were correct no-go, error,  
148 or odorless (Fig. S3C), suggesting that the distinct go-cue excitation responses reflected signals  
149 eliciting appropriate motivational behavior. Notably, the intensities of the majority of the cue  
150 responses were kept stable across trials (Fig. S3D). In conclusion, the distinct go-cue excitation

151 responses were triggered by odor onset and stable with respect to the appropriate odor-guided  
152 behaviors.

153

### 154 **nLOT neuron population exhibits rapid response dynamics before executing cue-odor-evoked** 155 **behaviors**

156 We demonstrated that the go-cue preferred neurons exhibited specific temporal dynamics during  
157 odor-sampling as a representative population of nLOT neurons (Fig. 2). Similarly, the no-go-cue  
158 preferred neurons exhibited both no-go-cue excitation and persistent go-cue inhibition during cue  
159 odor presentation at ~600 msec (Fig. S4). The cue excitatory neurons and the cue inhibitory neurons  
160 also changed their firing rates during odor-sampling (Figs. S5 and S6). Thus, the nLOT neurons  
161 exhibited diverse firing patterns and complex temporal dynamics during odor-sampling. In this  
162 section, we examined the nLOT population encoding and the contribution of each neuron group  
163 during odor-sampling using different methods of analysis.

164         Calculating go-cue versus no-go-cue preference during odor-sampling clearly showed the  
165 strong encodings of cue preference at 400–500 msec after the odor onset across the population (Fig.  
166 3A,  $p < 0.01$ , permutation test). To gain insight into the dynamics of the population response, we  
167 visualized the average population activity using principal component analysis, a dimensionality  
168 reduction method (Fig. S7). Fig. 3B shows trajectories of the mean response of the nLOT neuron  
169 population to go-cue and no-go-cue odors, represented as the projections onto the first three  
170 principal components (PC) during the odor-sampling epoch. Throughout the approximately 300  
171 msec interval from the odor onset, trajectories remained converged, showing little difference across  
172 conditions. Over the late phase of odor-sampling, specifically 400–500 msec from the odor onset,  
173 trajectories in the odor-sampling epoch subspace began to spread out and clearly separated at the  
174 population level. To quantify these observations, we measured the instantaneous separation  
175 between the population cue responses (Fig. 3C). The separation reached a maximum at ~500 msec

176 and remained above the baseline levels until the odor port exit. Additionally, we calculated the rate  
177 at which the population activity vectors changed (width: 100 msec, step: 20 msec; Fig. 3D). These  
178 rates increased to a maximum within ~500 msec and remained above the baseline levels over the  
179 initiations of cue-odor-evoked behaviors (go or no-go behaviors). Thus, the nLOT neuron  
180 population dramatically showed profound transformations in the dynamics of cue encoding at 400–  
181 500 msec after the odor onset.

182         Next, we examined the mechanism of the contribution of individual nLOT neurons to the  
183 population response to evaluate the absolute values of PC coefficients as the neural weights (Figs.  
184 3E and S7A-C). The values of the neural weights in the first dimension of the odor-sampling epoch  
185 subspaces showed that type I neurons contributed considerably to the population response. To  
186 further examine the contributions along the time course, we calculated the absolute values of the  
187 PC coefficients in the sliding bins (width: 100 msec, step: 20 msec) during the odor-sampling epoch  
188 (Figs. 3F and S7D). The values of the neural weights in the first dimension of each bin exhibited  
189 significant contributions of type I neurons to the population response, especially during 400–500  
190 msec after the odor onset, corresponding to the dynamics of cue encoding. These results indicated  
191 that the go-cue preferred neurons strongly contributed to the profound transformations in the  
192 dynamics of nLOT cue encoding.

193

#### 194 **nLOT neurons provided sufficient information to account for behavioral accuracy**

195 To examine whether the population activity accounted for the animals' behavioral accuracy, we  
196 performed a decoding analysis. This analysis determined whether the firing rates of the nLOT  
197 neuron populations could be used to classify each individual trial as go or no-go. We used support  
198 vector machines with linear kernels as a decoder. Analyses of the decoding time course based on  
199 nLOT neurons using a sliding time window revealed that the decoding accuracy was maintained at  
200 chance levels 300 msec after the odor onset and subsequently dramatically increased above the



201 level of animals' behavioral accuracy 400–500 msec after the odor onset (Fig. 4A). In the 400–500  
202 msec period, 124 neurons provided sufficient information to account for the behavioral accuracy  
203 (the top right panel in Fig. 4A). Thus, fewer than 150 nLOT neurons provided sufficient information  
204 to account for behavioral accuracy at least 500 msec after the odor onset.

205 To further examine the contribution of neural decoding for each nLOT neuron group, we  
206 calculated the decoding accuracy based on 20 randomly sampled neurons without replacement  
207 during the 400–500 msec period after the odor onset (Fig. 4B). The proportions of type I neurons  
208 in the sampled datasets were correlated with the decoding accuracies (Figs. 4B and S8). Next, we  
209 sought to rule out the possibility that the bias of the neuron group size affected the contribution of  
210 neural decoding. To rule out this prospect, we also calculated the decoding accuracy based on 20  
211 randomly sampled neurons from each nLOT neuron group (Fig. 4C). The decoding accuracy using  
212 the type I neuron group reached more than 90%, indicating that only a small number of type I  
213 neurons provided more information to account for behavioral choices. Thus, the nLOT had a large  
214 population of neurons that strongly correlated with the animals' behavioral choices.

215

### 216 **Bi-Directional cue-outcome encoding following odor-guided behaviors**

217 Our analyses of the dynamics of cue encoding suggest that many nLOT neurons maintained cue  
218 selective responses during cue-odor-evoked behaviors after odor-sampling. Notably, the persistent  
219 inhibition responses of type I neurons during the no-go-cue odor-sampling were sustained over the  
220 odor port exit (Figs. 2B-D). This raises the query of whether the selectivity disappears or persists  
221 once the cue-odor-evoked behaviors are executed. By aligning the neural activity to behavioral  
222 events (event-aligned spike histograms, see Materials and methods), we noticed that type I neurons  
223 were selective for the reward drinking behavior after go-cue odor-sampling and the persistent  
224 inhibition responses were sustained during the no-go waiting behavior after no-go-cue odor-  
225 sampling (Fig. 5A). We quantified the response profiles of each neuron group during odor-evoked

226 behaviors by calculating the firing rate changes from baseline (Figs. 5B-C and S9A, the spike data  
227 were aligned to the odor port exit and water port entry). Across the population, many type I neurons  
228 showed significant excitatory responses for the drinking behavior (purple histogram at the top in  
229 Fig. 5B,  $p < 0.01$ , permutation test), and significant inhibitory responses for the no-go waiting  
230 behavior (purple histogram at the bottom in Fig. 5C,  $p < 0.01$ , permutation test). The drinking  
231 responses of type I neurons were higher than those of other groups and the no-go waiting responses  
232 of type I neurons were lower than those of other groups, indicating that they were type I neuron  
233 specific responses (Fig. S9B, one-way analysis of variance with Tukey's post hoc test). For each  
234 neuron, the inhibitions were maintained for 800 msec (interquartile range: 290–1480 msec) from  
235 the initiation of the no-go behavior. Thus, type I neurons exhibited associations between the go-cue  
236 excitations and excitatory responses for drinking behavior with persistent no-go-cue inhibitions,  
237 suggesting that nLOT neurons are involved in cue-outcome associations.

238 We aimed to determine if the other neuron groups responded to the cue-odor-evoked  
239 behavioral states. Many type II neurons showed significant inhibitory responses for the drinking  
240 behavior (orange histogram at the bottom in Fig. 5B,  $p < 0.01$ , permutation test) and significant  
241 excitatory responses for the no-go waiting behavior (orange histogram at the top in Fig. 5C,  $p <$   
242  $0.01$ , permutation test). The drinking responses of type II neurons were lower than those of type I  
243 neurons and the no-go waiting responses of type II neurons were higher than those of type I neurons  
244 (Fig. S9B, one-way analysis of variance with Tukey's post hoc test). Thus, the type I and type II  
245 neurons contrastingly encoded the go/no-go behavioral states after the odor-sampling. Furthermore,  
246 a subset of type III, IV, and V neurons tended to show an excitatory response in a specific time  
247 window in behavioral epochs, with inhibitory responses relative to other behavioral epochs (Fig.  
248 S9C). Particularly, each type IV neuron maintained the excitatory response to the no-go waiting  
249 state (light blue histogram at the top in Fig. 5C,  $p < 0.01$ , permutation test) for 560 msec  
250 (interquartile range: 205–1200 msec) from 290 msec (interquartile range: 210–650 msec) after

251 initiation of the no-go behavior. These results indicate that each nLOT neuron group showed a  
252 specific firing pattern during odor-guided behaviors, depending on the response profiles in the odor-  
253 sampling epochs.

254

255

## 256 **Discussion**

### 257 **Electrophysiological features of the nLOT neurons**

258 The purpose of the study was to understand the electrophysiological features of nLOT neurons on  
259 motivational processes that occur during various behavioral states in odor-guided go/no-go tasks.  
260 In this study, we provided the first recording of neuronal activity in the nLOT in freely behaving  
261 mice performing odor-guided go/no-go tasks. Indeed, nLOT neurons exhibited diverse neural  
262 activities in response to odor presentations and cue odor-evoked behaviors in the task.

263 Previous anatomical studies have shown that the nLOT receives odor information from the  
264 olfactory bulb and various areas of the olfactory cortex, including the piriform cortex (1, 2).  
265 Subsequently, nLOT neurons project to the ventral striatum consisting of the olfactory tubercle  
266 (OT) and the nucleus accumbens (NAc) and also sends the axon into the basolateral amygdala  
267 (BLA) (1, 2, 6) that plays the critical role of regulating motivated behaviors (8-10). Moreover, a  
268 recent study (7) showed that nLOT-lesioned rats exhibited olfactory-related behavioral deficits with  
269 an incapacity to identify and discriminate between odors and interfered with the display of innate  
270 odor-evoked behaviors, such as sexual behavior, aggression, and avoidance of predators. Despite  
271 the accumulation of knowledge, the role of nLOT in the functional circuit to convert odor  
272 information into appropriate behaviors have not been clarified.

273 In this study, we classified five types of neurons on the basis of their firing pattern during  
274 the odor-sampling epochs. A majority of nLOT neurons (type I neurons, go-cue preferred neurons)  
275 exhibited phasic excitatory responses during go-cue odor-sampling epochs and sustained inhibitory

276 responses during no-go-cue odor-sampling epochs (Figs. 1C and 2). The activity pattern of the no-  
277 go-cue preferred neurons (type II neurons) was opposite to that of the go-cue preferred neurons  
278 (Fig. S4). These bi-directional cue encoding patterns are similar to the cue encoding in the brain  
279 reward circuit, including the ventral striatum and the ventral tegmental area (11-13) rather than the  
280 olfactory circuit (14-16) during cue-outcome association tasks. We also demonstrated that the go-  
281 cue and no-go-cue preferred neurons highly contributed to the population dynamics of cue encoding  
282 and the decoding, for accuracy of the animal's choices (Figs. 3 and 4), suggesting that these bi-  
283 directional response neurons for cue odors effectively provide sufficient information to account for  
284 behavioral choices. These bi-directional cue encoding small number of neurons having high level  
285 of information may be effective in the nLOT with only a small volume of 0.24 mm<sup>3</sup> and 19,000  
286 neurons (17).

287         The go-cue preferred neurons also showed firing activities during drinking behavior (Fig.  
288 5B), consistent with other brain areas involved in motivational processes (18, 19). Additionally, the  
289 go-cue preferred neurons exhibited suppressed responses to the no-go waiting behavioral states  
290 (Figs. 5C and S9B). Moreover, the no-go-cue preferred neurons suppressed their firing activity  
291 during the go behavioral states and exhibited excitatory activities in the no-go behavioral states  
292 (Figs. 5B-C and S9B). These results suggest that these nLOT neurons functionally associate the  
293 cue odor with the precise task outcomes derived from the odor information. Additionally, since the  
294 decoding analysis revealed that the responses of the go-cue and no-go-cue preferred neurons during  
295 the odor-sampling epoch contained information dictating the animal's choice (Fig. 4), we speculate  
296 that the nLOT is one of the critical components of the circuitry responsible for creating and  
297 providing signals eliciting appropriate motivational behavior into the motivation circuits, including  
298 the ventral striatum and BLA. Due to the function of nLOT, we assume that the lesion of nLOT  
299 caused inhibition of olfactory-driven behaviors (7).

300 The subsets of type III, IV, and V neurons exhibited an excitatory response in a specific  
301 time window in behavioral epochs with inhibitory responses relative to other behavioral epochs  
302 (Fig. S9C). These results raise the probability that they represent the behavioral context of the task.  
303 A recent study showed the brain-wide global representation of the state-dependent activity during  
304 odor-guided motivated behavior (20). We assume that the context-dependent activities of the type  
305 III, IV, and V neurons may contribute to the brain-wide specific information processing mode in  
306 the brain.

307

### 308 **Neural circuits including the nLOT**

309 Olfactory information is transmitted into the nLOT with a three-layered structure (layers I, II, and  
310 III). The nLOT layer II neurons contributing to over 80% of the total neuronal population of the  
311 nLOT (17), project to the dwarf cell regions in the OT (6). The OT sends a major projection to the  
312 ventral pallidum regulating expected positive and negative valences (21-23). The layer II neurons  
313 also project to the NAc shell (6) that processes hedonic or motivational value (24-27). Similar to  
314 the neural responses in these areas, we demonstrated the reward-predicting cue and reward signals  
315 of type I neurons in the nLOT (Figs. 2 and 5). In the context of a recent frontal cortex research  
316 showing a connectivity-defined neuron type that carries a single variable (28), we speculate that  
317 type I neuron outputs in the nLOT layer II to the OT and NAc contribute to the encoding of the  
318 positive or negative valences of expected and actual outcomes, and hedonic or motivational value.

319 Conversely, the nLOT layer III neurons project to the BLA (6) that is an essential  
320 component of the amygdala underlying fear conditioning memory (8, 29). We demonstrated the no-  
321 go-cue preferred responses of type II neurons (Figs. 5 and S4) and the sustained positive responses  
322 to the no-go behaviors of type IV neurons. We assumed that these specific firing patterns in the  
323 nLOT layer III may contribute to the fear conditioning memory circuits. However, we have not  
324 verified the firing pattern of the nLOT neurons in the fear memory tasks. Future experiments are

325 required to monitor the changes in the firing activity in the nLOT during odor-punishment  
326 association tasks.

327 We acknowledge that there are several limitations in this study. First, although we  
328 performed the first *in vivo* recording of neuronal activity in the nLOT during only an odor-guided  
329 go/no-go task, our data do not reflect the neuronal activity across different cue modalities,  
330 behavioral paradigms, and contexts. However, our data are potentially important in that the nLOT  
331 neural activity in freely behaving mice is modulated by the motivation of learned, odor-guided, and  
332 goal-directed behaviors, and may provide basic information regarding the nLOT encoding in  
333 positive and negative motivational contexts, reversal learning, and innate odor-driven behaviors  
334 (30). Second, a direct relationship between the distinct cue response of the nLOT neurons and  
335 context-dependent motivated behaviors is unclear. Third, the response profiles and functions of the  
336 nLOT specific projections to OT, NAc, and BLA on motivational processes have not yet been  
337 clarified. By using optogenetic manipulation or the fiber photometry tool to monitor cell-type and  
338 projection specific population activity, future studies can build on the paradigm and findings  
339 described here to address how the nLOT interacts with the projected areas to mediate the processes  
340 necessary for odor-guided behavior.

341 In conclusion, we extended the concept that nLOT integrity was required for the normal  
342 functioning of the olfactory system (7) and hypothesized that the nLOT plays a critical role in  
343 providing the odor information that elicited appropriate behavioral motivation into the motivation  
344 circuits in the odor-guided behavior. In a broad perspective, the verification of this hypothesis may  
345 have important implications for studying and leveraging neural circuits underlying odor-evoked  
346 motivation in health and disease.

347

348

349 **Materials and methods**

## 350 **Animals**

351 All the experiments were performed on male C57BL/6 mice (9 weeks old; weighing 20-25 g)  
352 purchased from Shimizu Laboratory Supplies Co., LTD., Kyoto, Japan. The mice were individually  
353 housed in a temperature-controlled environment with a 13-h light/11-h dark cycle (lights on at 8:00  
354 and off at 21:00). They were provided with water after the training and recording sessions to ensure  
355 that the body weights dipped no lower than 85% of the initial levels and food was supplied ad  
356 libitum. All experiments were performed in accordance with the guidelines for animal experiments  
357 at Doshisha University and with the approval of the Doshisha University Animal Research  
358 Committee.

359

## 360 **Apparatus**

361 We used a behavioral apparatus controlled by the Bpod State Machine r0.5 (Sanworks LLC, NY,  
362 USA), an open-source control device designed for behavioral tasks. The apparatus was comprised  
363 of a custom-designed mouse behavior box with two nose-poke ports on the front wall. The box was  
364 contained in another soundproof box (BrainScience Idea. Co., Ltd., Osaka, Japan) equipped with a  
365 ventilator fan that provided adequate air circulation and low-level background noise. Each of the  
366 two nose-poke ports had a white light-emitting diode (LED) and infrared photodiodes. Interruption  
367 of the infrared beam generated a transistor-transistor-logic (TTL) pulse, thus signaling the entry of  
368 the mouse head into the port. The odor delivery port was equipped with stainless steel tubing  
369 connected to a custom-made olfactometer (31). Eugenol was used as the go-cue odor and amyl  
370 acetate (Tokyo Chemical Industry Co., Ltd., Tokyo, Japan) as the no-go-cue odor. These odors  
371 were diluted to 10% in mineral oil and further diluted to 1:9 by airflow. Water reward delivery was  
372 based on gravitational flow, controlled by a solenoid valve (The Lee Company, CT, USA), and  
373 connected via Tygon tubing to stainless steel tubing. The reward amount (6  $\mu$ L) was determined by  
374 the opening duration of the solenoid valve and was regularly calibrated.

375

## 376 **Odor-Guided go/no-go task**

377 After a 3 sec inter-trial interval, each trial began by illuminating the LED light at the right odor port,  
378 which instructed the mouse to nose poke into that port. A nose poke into the odor port resulted in  
379 the delivery of one of the two cue odors for 500 msec. The mice were required to maintain their  
380 nose poke during odor stimulation to sniff the odor. After odor stimulation, the LED light was  
381 turned off and the mice could withdraw their noses from the odor ports. If eugenol odor (go-cue  
382 odor) was presented, the mice were required to move to and nose poke into the left water reward  
383 port within a timeout period of 2 sec. At the water port, the mice were required to maintain their  
384 nose poke for 300 msec before water delivery began. Next, 6  $\mu$ L of water was delivered as a reward.  
385 If an amyl acetate odor (no-go-cue odor) was presented, the mice were required to avoid entering  
386 the water port for 2 sec following odor stimulation. Once in 10 trials, we introduced catch trials in  
387 which the air stream was delivered through a filter containing no odorants during which the mice  
388 were not rewarded whichever behavior they chose (go or no-go behavior). The accuracy rate was  
389 calculated as the total percentage of successes in the go and no-go trials in a session. The mice  
390 performed up to 448 trials (go error: ~20 trials, no-go error: ~4 trials, go in catch trials: ~11 trials,  
391 no-go in catch trials: ~37 trials) in each session per day.

392

## 393 **Electrophysiology**

394 The mice were anesthetized with medetomidine (0.75 mg/kg i.p.), midazolam (4.0 mg/kg i.p.), and  
395 butorphanol (5.0 mg/kg i.p.), and implanted with a custom-built microdrive of four tetrodes in the  
396 nLOT (0.1 mm anterior to the bregma, 2.0 mm lateral to the midline). Individual tetrodes consisted  
397 of four twisted polyimide-coated tungsten wires (California Fine Wire, single wire diameter 12.5  
398  $\mu$ m, gold plated to less than 500 k $\Omega$ ). Two additional screws were threaded into the bone above the  
399 cerebellum for reference. The electrodes were connected to an electrode interface board (EIB-18,



400 Neuralynx, MT, USA) on the microdrive. The microdrive array was fixed to the skull with  
401 LOCTITE 454 (Henkel Corporation, Düsseldorf, Germany). After the completion of surgery, the  
402 mice received atipamezole (0.75 mg/kg i.p.) to reverse the effects of medetomidine and allow for a  
403 shorter recovery period. Additionally, the mice received analgesics (ketoprofen, 5 mg/kg, i.p.).  
404 Behavioral training resumed at least 1 week after the surgery. Electrical signals were obtained with  
405 an open-source hardware (Open Ephys). For unit recordings, signals were sampled at 30 kHz in  
406 Open Ephys and band-pass filtered at 600–6,000 Hz. After each recording, tetrodes were adjusted  
407 to obtain new units.

408

#### 409 **Data analyses**

410 All data analyses were performed using built-in and custom-built software in MATLAB 2019a (The  
411 Mathworks, Inc., MA, USA).

412

413 Spike sorting: Spikes were sorted into clusters offline based on their waveform energy, peak  
414 amplitudes, and the first principal components from the four tetrode channels using an automated  
415 spike-separation algorithm KlustaKwik (K.D. Harris). The resulting classifications were corrected  
416 and refined manually with the MClust software (A.D. Redish). The clusters were considered as  
417 single units only when the following criteria were met: (1) refractory period (2 msec) violations  
418 were less than 0.2% of all spikes and (2) the isolation distance, estimated as the distance from the  
419 center of the identified cluster to the nearest cluster based on the Mahalanobis distance, was more  
420 than 20.

421

422 Spike train analyses: Neural and behavioral data were synchronized by inputting each event  
423 timestamp from the Bpod behavioral control system into the electric signal recordings system. To

424 calculate the firing rates during tasks, peri-event time histograms (PETHs) were calculated using a  
425 20 msec bin width and smoothed by convolving spike trains with a 60 msec wide Gaussian filter.

426 To examine the relationship between the firing rate changes among individual nLOT  
427 neurons and the development of behavioral epochs in behavioral tasks, we created event-aligned  
428 spike histograms (EASHs) (32). As behavioral epoch durations varied for each trial, the median  
429 durations of the epoch were calculated first. In the odor-guided go/no-go task, the median duration  
430 of odor-sampling epochs (from the odor onset to the odor port exit) was 788 msec in the go trials,  
431 642 msec in the no-go trials, and the median duration of moving epochs (from the odor port exit to  
432 the water port entry) was 388 msec. The spike timing during each epoch and for each trial was  
433 linearly transformed to correspond with the median behavioral duration of each epoch. The number  
434 of spikes in each epoch was preserved. Furthermore, we defined the waiting epoch (300 msec  
435 reward delay, from the water port entry to the onset of the water reward) and the drinking epoch  
436 (1,000 msec after the onset of the water reward). These epochs were not applied to the  
437 transformation because their durations did not change across trials. In this way, the regular raster  
438 plots were transformed into event-aligned raster plots. Consequently, an EASH was calculated  
439 using a 20 msec bin width and smoothed by convolving the spike trains with a 60 msec wide  
440 Gaussian filter from the event-aligned raster plots (Fig. 5A).

441

442 ROC analyses: To quantify the firing rate changes, we used an algorithm based on ROC analyses  
443 that calculates the ability of an ideal observer to classify whether a given spike rate was recorded  
444 in one of two conditions (e.g., during go-cue or no-go-cue odor presentation) (33). We defined an  
445 auROC equal to 2 (ROCarea – 0.5), with the measure ranging from –1 to 1, where –1 signifies the  
446 strongest possible value for one alternative and 1 signifies the strongest possible value for the other.

447 The statistical significance of these ROC analyses was determined with a permutation test.  
448 For this test, we recalculated the ROC curves after randomly reassigning all firing rates to either of

449 the two groups arbitrarily. This procedure was repeated a large number of times (500 repeats for  
450 analyses of dynamics (Figs. 2D-E, 3A, 5B-C, S2, S4D-E, S5D-E, and S6D-E), 1000 repeats for all  
451 other analyses) to obtain a distribution of values. Subsequently, we calculated the fraction of  
452 random values exceeding the actual value. For all analyses, we tested for significance at  $\alpha = 0.01$ .  
453 Only neurons with a minimum number of three trials for each analyzed condition were included in  
454 the analyses.

455 For analyses of dynamics (width: 100 msec, step: 20 msec), we calculated three measures  
456 from the auROC values of correct trials (Figs. 2D, 5B-C, S4D, S5D, and S6D):

457 (1) Time of center of mass: This refers to the time corresponding to the center of mass of the  
458 significant points of the auROC values ( $p < 0.01$ , permutation test). Only neurons with the  
459 significant points for each analyzed condition were included in this analysis.

460 (2) Duration: This refers to the duration in which the auROC values were significant ( $p < 0.01$ ,  
461 permutation test) for five or more consecutive bins, containing the time of center of mass. Only  
462 neurons with consecutive bins for each analyzed condition were included in this analysis.

463 (3) Onset time: The onset time refers to the time at which the duration was first evident.

464

465 The classification of nLOT neurons: Based on the ROC analyses during the odor-sampling epoch,  
466 we classified the nLOT neurons into five types (Figs. 1C and S1). First, we calculated the auROC  
467 values of the go-cue versus baseline (1,000 to 0 msec before the end of the inter trial interval) and  
468 the no-go-cue versus baseline during the odor-sampling epoch in the correct trials. Based on these  
469 values, we defined the cue odor selective population that exhibited significant responses for at least  
470 one of the cue odor presentations and cue odor non-selective population (type V neurons). Second,  
471 in the cue odor selective population, we also calculated the auROC values of the go-cue versus the  
472 no-go-cue during the odor-sampling epoch in the correct trials. Based on these values, we defined  
473 go-cue preferred neurons (significant go-cue > no-go-cue, type I neurons) and no-go-cue preferred

474 neurons (significant go-cue < no-go-cue, type II neurons). Finally, in the remaining population, we  
475 also calculated the auROC values of cue odors (go-cue + no-go-cue) versus baseline during the  
476 odor-sampling epoch in the correct trials. Based on these values, we defined cue excitatory neurons  
477 (cue odors > baseline, type III neurons) and cue inhibitory neurons (cue odors < baseline, type IV  
478 neurons). For all analyses above, we tested for significance at  $\alpha = 0.01$  (permutation test).

479

480 Population vector construction and analyses: We constructed the 2 conditions (71 time bins)  $\times$  365  
481 neurons matrix (34-36) during the odor-sampling epoch, in which columns contained the auROC  
482 values of the correct trials corresponding to the trial-averaged firing rate changes from the baseline  
483 (Fig. S7A). By performing principal component analysis (PCA) on the dataset, we reduced the  
484 dimensionality of the nLOT population from 365 neurons to three principal components (PCs) and  
485 obtained the odor-sampling epoch subspaces. Notably, we used the three subspaces because 82.8%  
486 of the total variance was explained (Fig. S7B). To visualize the nLOT population responses, we  
487 projected the dataset onto the three-dimensional subspaces (Fig. 3B). This allowed us to obtain a  
488 point reflecting the response of the entire population for each of the two conditions at a given instant.  
489 The distance between the cue responses was computed as the Euclidean distance between pairs of  
490 activity vectors of all subspaces at a given instant (Fig. 3C) (14, 37). The velocity of population  
491 responses was determined as the distance between successive 20 msec bins (Fig. 3D) (37). These  
492 values were compared with the values during the baseline epoch (200 to 0 msec before the end of  
493 the inter trial interval).

494 To examine the contribution of individual neurons to the cue encoding, we evaluated the  
495 absolute values of PC coefficients as the neural weights (Figs. 3E, S7A, and S7C). We also  
496 evaluated contributions along the time course by calculating the absolute values of PC coefficients  
497 in the sliding bins (width: 100 msec, step: 20 msec) during odor-sampling (Figs. 3F and S7D).

498

499 SVM decoding analyses: We used a support vector machine (SVM) algorithm with a linear kernel  
500 as a classifier (14, 15) and a Matlab function (fitsvm) for analyses. All analyses were conducted  
501 on trial data pooled across animals. A matrix containing concatenated firing rates for each trial and  
502 each neuron provided input to the classifier. The matrix dimensions were the number of cells by  
503 the number of trials. To avoid over-fitting, k-fold cross-validation ( $k = 10$ ) was used to calculate  
504 the decoding accuracy of trial type discriminations. To compute the decoding accuracy, 40 trials  
505 for each trial type (from start of the session) were chosen as the dataset. Next, the dataset was  
506 partitioned into ten equal parts—one part was used for testing and the remaining parts were used  
507 for training the classifier. This process was repeated ten times to test each individual part; the mean  
508 value of the accuracy was used for decoding accuracy. To compute the decoding accuracy of a 100  
509 msec bin window (step: 20 msec), the classifier was trained and tested with a 100 msec bin window  
510 (step: 20 msec).

511 To investigate the relationship between the decoding accuracies and the number of neurons  
512 that used them, we calculated the decoding accuracy based on 1-364 randomly sampled neurons  
513 (500 repeats) without replacement (Figs. 4 and S8A). Furthermore, we examined the relationship  
514 between the decoding accuracy and the contribution of each nLOT neuron type by calculating the  
515 decoding accuracy based on 20 randomly sampled neurons (500 repeats) from each neuron group  
516 (Fig. 4C). These results were independent of the number of neurons (Fig. S8B).

517

518 Statistical analyses: The data were analyzed using MATLAB 2019a. The statistical methods in each  
519 analysis have been described in the Results section or figure legends. The Tukey-Kramer method  
520 was applied for the tests of significance with multiple comparisons. Although the sample sizes in  
521 this study were not pre-determined by sample size calculations, they were based on previous  
522 research in the olfactory cortex fields (15, 38). Randomization and blinding were not employed.

523 Biological replicates for the histological studies are described in the figure legends.

524

## 525 **Histology**

526 After recording, the mice were deeply anesthetized by an intraperitoneal injection of sodium  
527 pentobarbital. Electric lesions were made using 10–20  $\mu$ A direct current stimulation for 5 sec of  
528 one of the four tetrode leads. The mice were perfused transcardially with phosphate-buffered saline  
529 (PBS) and subsequently with 4% paraformaldehyde (PFA). The brains were removed from the skull  
530 and post-fixed in PFA. Next, the brains were cut into 50- $\mu$ m thick coronal sections and stained with  
531 cresyl violet. The electrode track positions were determined in reference to the atlas developed by  
532 Paxinos and Watson (39).

533

## 534 **References**

- 535 1. J. L. Price, An autoradiographic study of complementary laminar patterns of termination of  
536 afferent fibers to the olfactory cortex. *J. Comp. Neurol.* **150**, 87–108 (1973).
- 537 2. M. B. Luskin, J. L. Price, The topographic organization of associational fibers of the  
538 olfactory system in the rat, including centrifugal fibers to the olfactory bulb. *J Comp*  
539 *Neurol.* **216**, 264–291 (1983).
- 540 3. B. C. Alheid GF, de Olmos JS, in *The rat nervous system, 2nd ed.*, P. G, Ed. (Academic  
541 Press, San Diego, ed. 2nd, 1995), pp. 443–493.
- 542 4. L. W. Swanson, G. D. Petrovich, What is the amygdala? *Trends Neurosci.* **21**, 323–331  
543 (1998).
- 544 5. A. G. de Olmos JS, Beltramino CA, in *The rat nervous system, 3rd edn.*, P. G, Ed.  
545 (Elsevier/Academic Press, San Diego, ed. 3rd, 2004), pp. 509–603.
- 546 6. A. C. Santiago, S. J. Shammah-Lagnado, Efferent, Connections of the Nucleus of the  
547 Lateral Olfactory Tract in the Rat. *J. Comp. Neurol.* **471**, 314–332 (2004).

- 548 7. R. P. Vaz, A. Cardoso, S. I. Sá, P. A. Pereira, M. D. Madeira, The integrity of the nucleus  
549 of the lateral olfactory tract is essential for the normal functioning of the olfactory system.  
550 *Brain Struct. Funct.* **222**, 3615–3637 (2017).
- 551 8. P. H. Janak, K. M. Tye, From circuits to behaviour in the amygdala. *Nature.* **517**, 284–292  
552 (2015).
- 553 9. K. Murata, M. Kanno, N. Ieki, K. Mori, M. Yamaguchi, Mapping of Learned Odor-  
554 Induced Motivated Behaviors in the Mouse Olfactory Tubercle. *J. Neurosci.* **35**, 10581–  
555 10599 (2015).
- 556 10. J. Cox, I. B. Witten, Striatal circuits for reward learning and decision-making. *Nat. Rev.*  
557 *Neurosci.* **20**, 482–494 (2019).
- 558 11. J. Y. Cohen, S. Haesler, L. Vong, B. B. Lowell, N. Uchida, Neuron-type-specific signals  
559 for reward and punishment in the ventral tegmental area. *Nature.* **482**, 85–88 (2012).
- 560 12. W. Menegas, B. M. Babayan, N. Uchida, M. Watabe-Uchida, Opposite initialization to  
561 novel cues in dopamine signaling in ventral and posterior striatum in mice. *Elife.* **6**, 1–26  
562 (2017).
- 563 13. M. Stephenson-Jones *et al.*, Opposing Contributions of GABAergic and Glutamatergic  
564 Ventral Pallidal Neurons to Motivational Behaviors. *Neuron.* **105**, 921-933.e5 (2020).
- 565 14. K. M. Cury, N. Uchida, Robust odor coding via inhalation-coupled transient activity in the  
566 mammalian olfactory bulb. *Neuron.* **68**, 570–585 (2010).
- 567 15. K. Miura, Z. F. Mainen, N. Uchida, Odor representations in olfactory cortex: distributed  
568 rate coding and decorrelated population activity. *Neuron.* **74**, 1087–1098 (2012).
- 569 16. N. Uchida, C. Poo, R. Haddad, Coding and Transformations in the Olfactory System.  
570 *Annu. Rev. Neurosci.* **37**, 363–385 (2014).
- 571 17. R. P. Vaz, P. A. Pereira, M. D. Madeira, Age effects on the nucleus of the lateral olfactory  
572 tract of the rat. *J. Comp. Neurol.* **524**, 759–771 (2016).

- 573 18. M. Watabe-Uchida, N. Eshel, N. Uchida, Neural Circuitry of Reward Prediction Error.  
574 *Annu. Rev. Neurosci.* **40**, 373–394 (2017).
- 575 19. N. A. Steinmetz, P. Zatzka-Haas, M. Carandini, K. D. Harris, Distributed coding of choice,  
576 action and engagement across the mouse brain. *Nature.* **576**, 266–273 (2019).
- 577 20. W. E. Allen *et al.*, Thirst regulates motivated behavior through modulation of brainwide  
578 neural population dynamics. *Science (80-. ).* **364**, eaav3932 (2019).
- 579 21. Y. Tachibana, O. Hikosaka, The Primate Ventral Pallidum Encodes Expected Reward  
580 Value and Regulates Motor Action. *Neuron.* **76**, 826–837 (2012).
- 581 22. J. M. Richard, F. Ambroggi, P. H. Janak, H. L. Fields, Ventral Pallidum Neurons Encode  
582 Incentive Value and Promote Cue-Elicited Instrumental Actions. *Neuron.* **90**, 1165–1173  
583 (2016).
- 584 23. Y. Saga *et al.*, Ventral pallidum encodes contextual information and controls aversive  
585 behaviors. *Cereb. Cortex.* **27**, 2528–2543 (2017).
- 586 24. A. E. Kelley, Ventral striatal control of appetitive motivation: Role in ingestive behavior  
587 and reward-related learning. *Neurosci. Biobehav. Rev.* **27**, 765–776 (2004).
- 588 25. E. P. Zorrilla, G. F. Koob, Amygdalostriatal projections in the neurocircuitry for  
589 motivation: a neuroanatomical thread through the career of Ann Kelley. *Neurosci.*  
590 *Biobehav. Rev.* **37**, 1932–1945 (2013).
- 591 26. M. P. Sadoris, F. Cacciapaglia, R. M. Wightman, R. M. Carelli, Differential dopamine  
592 release dynamics in the nucleus accumbens core and shell reveal complementary signals  
593 for error prediction and incentive motivation. *J. Neurosci.* **35**, 11572–11582 (2015).
- 594 27. D. C. Castro, S. L. Cole, K. C. Berridge, Lateral hypothalamus, nucleus accumbens, and  
595 ventral pallidum roles in eating and hunger: Interactions between homeostatic and reward  
596 circuitry. *Front. Syst. Neurosci.* **9**, 1–17 (2015).



- 597 28. J. Hirokawa, A. Vaughan, P. Masset, T. Ott, A. Kepecs, Frontal cortex neuron types  
598 categorically encode single decision variables. *Nature*. **576**, 446–451 (2019).
- 599 29. X. Zhang, J. Kim, S. Tonegawa, Amygdala Reward Neurons Form and Store Fear  
600 Extinction Memory. *Neuron*. **105**, 1077-1093.e7 (2020).
- 601 30. C. M. Root, C. A. Denny, R. Hen, R. Axel, The participation of cortical amygdala in  
602 innate, odour-driven behaviour. *Nature*. **515**, 269–273 (2014).
- 603 31. N. Uchida, Z. F. Mainen, Speed and accuracy of olfactory discrimination in the rat. *Nat*  
604 *Neurosci*. **6**, 1224–1229 (2003).
- 605 32. M. Ito, K. Doya, Distinct neural representation in the dorsolateral, dorsomedial, and ventral  
606 parts of the striatum during fixed- and free-choice tasks. *J. Neurosci*. **35**, 3499–3514  
607 (2015).
- 608 33. G. Felsen, Z. F. Mainen, Neural Substrates of Sensory-Guided Locomotor Decisions in the  
609 Rat Superior Colliculus. *Neuron*. **60**, 137–148 (2008).
- 610 34. J. D. Murray *et al.*, Stable population coding for working memory coexists with  
611 heterogeneous neural dynamics in prefrontal cortex. *Proc. Natl. Acad. Sci. U. S. A*. **114**,  
612 394–399 (2017).
- 613 35. S. E. Cavanagh, J. P. Towers, J. D. Wallis, L. T. Hunt, S. W. Kennerley, Reconciling  
614 persistent and dynamic hypotheses of working memory coding in prefrontal cortex. *Nat*.  
615 *Commun*. **9**, 1–16 (2018).
- 616 36. T. Ohnuki, Y. Osako, H. Manabe, Y. Sakurai, J. Hirokawa, Dynamic coordination of the  
617 perirhinal cortical neurons supports coherent representations between task epochs.  
618 *Commun. Biol*. **3**, 406 (2020).
- 619 37. O. Mazor, G. Laurent, Transient dynamics versus fixed points in odor representations by  
620 locust antennal lobe projection neurons. *Neuron*. **48**, 661–673 (2005).

- 621 38. H. Manabe, I. Kusumoto-Yoshida, M. Ota, K. Mori, Olfactory cortex generates  
622 synchronized top-down inputs to the olfactory bulb during slow-wave sleep. *J. Neurosci.*  
623 **31**, 8123–8133 (2011).
- 624 39. G. Paxinos, *The mouse brain in stereotaxic coordinates* / George Paxinos, Keith Franklin  
625 (Academic, London, 2004).

626

627

### 628 **Acknowledgments**

629 We thank Nozomi Fukui for assistance data collection and the lab members for valuable discussions.  
630 And we thank Hideki Tanisumi for providing illustrations in the figures. H.M. was supported by  
631 the Takeda Science Foundation, and JSPS KAKENHI Grant Numbers 25135708, 16K14557. Y.S.  
632 was supported by JSPS KAKENHI Grant Numbers 20H00109, 20H05020.

633

### 634 **Author contributions**

635 Y.T., K.S. and H.M. designed the experiments, Y.T., K.S. and H.M. performed experiments. Y.T.,  
636 K.S., J.H. and H.M. performed data analysis. Y.T., K.S. and H.M. wrote the paper. Y.S. supported  
637 and advised the project.

638

639

640

641

642

643

644

645

646 **Figures**

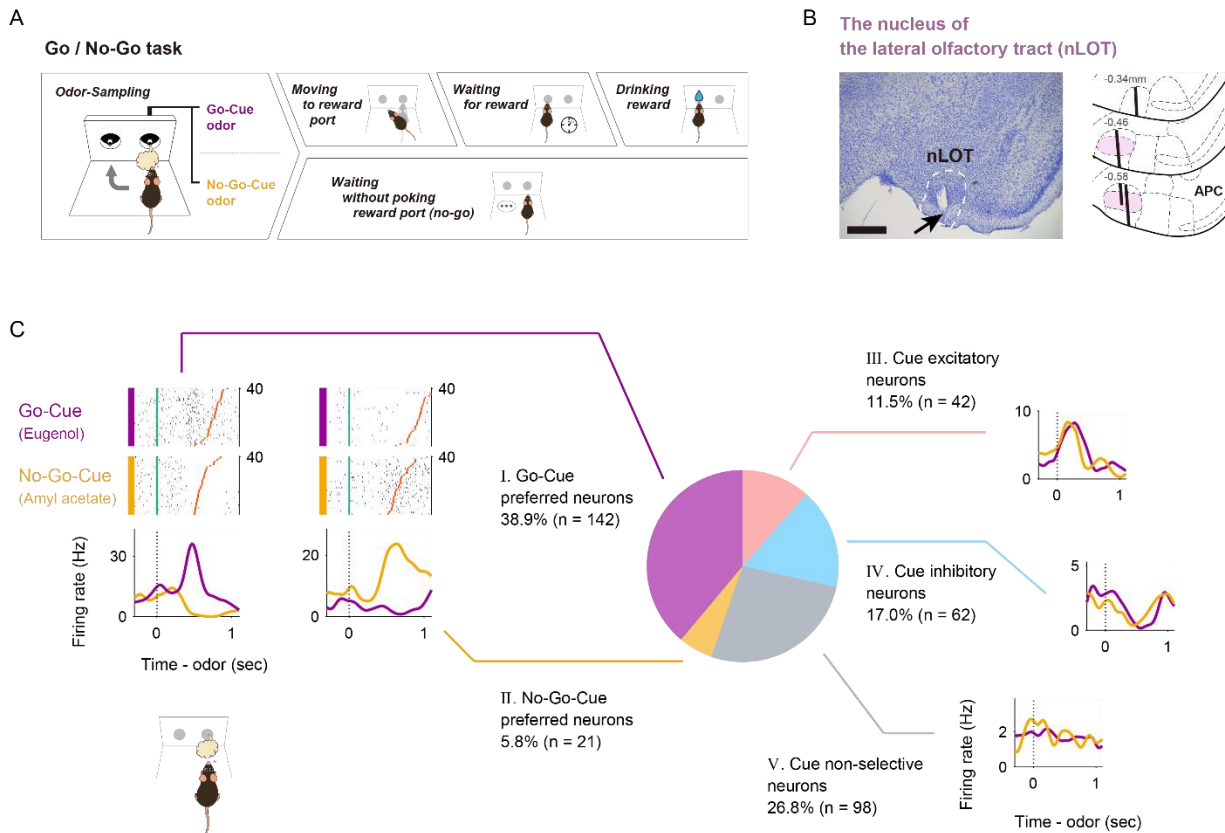

647

648

649 **Fig. 1. Nucleus of the lateral olfactory tract (nLOT) neuron activity patterns during the odor-**

650 **guided go/no-go task.**

651 (A) Time course of the odor-guided go/no-go task. Behavioral epoch temporal progression from

652 left to right.

653 (B) Nissl-stained frontal section (an arrow indicates a tip of the tetrodes) and recording tracks

654 (vertical thick lines) of the nLOT. The pink areas show layer II of the nLOT. APC, anterior piriform

655 cortex. Scale bar: 500  $\mu$ m.

656 (C) Example firing patterns of nLOT neurons during the odor-sampling epoch (the time from the

657 odor valve opening to odor port exit) in the odor-guided go/no-go task. Each row contains the spikes

658 (black ticks) for one trial, aligned to the time of odor valve opening (corresponding to the odor port

659 entry, green ticks). Red ticks refer to the times of odor port exit. The correct trials are grouped by

660 odor and within each group are sorted by the duration of the odor-sampling epoch (40 selected trials

661 from the end of the session are shown per category). Histograms are averaged across odors and  
662 calculated using a 20 msec bin width and smoothed by convolving spike trains with a 60 msec-wide  
663 Gaussian filter (purple, go-cue odor; orange, no-go-cue odor). Vertical dashed lines indicate the  
664 time of the odor valve opening. nLOT neurons were classified into five types (purple pie, type I;  
665 orange pie, type II; pink pie, type III; light blue pie, type IV; and gray pie, type V) based on the  
666 odor-sampling epoch response (Fig. S1).

667

668

669

670

671

672

673

674

675

676

677

678

679

680

681

682

683

684

685

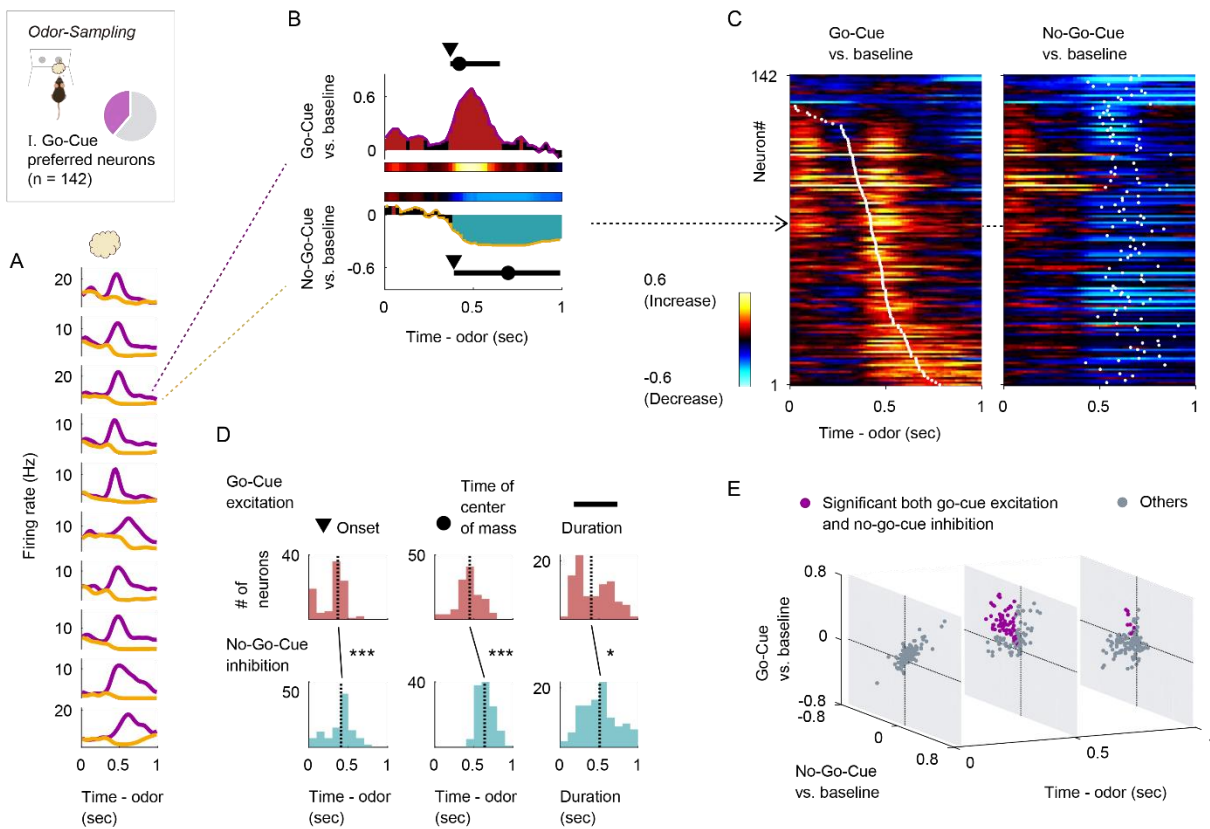

686

687

688 **Fig. 2. Go-Cue preferred neurons showed phasic excitation to go-cue odor and persistent**  
 689 **inhibition to no-go-cue odor.**

690 (A) The example firing patterns of go-cue preferred neurons during the odor-sampling epoch. Spike  
 691 histograms are calculated using a 20 msec bin width and smoothed by convolving spike trains with  
 692 a 60 msec wide Gaussian filter (purple line, go-cue odor; orange line, no-go-cue odor).

693 (B) Example of the area under the receiver operating characteristic curve (auROC) values for a go-cue  
 694 preferred neuron. The auROC values (aligned by odor valve opening) were calculated by go-cue  
 695 odor presentation versus baseline (top) and no-go-cue odor presentation versus baseline  
 696 (bottom) in the sliding bins (width, 100 msec; step, 20 msec). The red bars show significant  
 697 excitation and blue bars show significant inhibition ( $p < 0.01$ , permutation test). Based on the  
 698 significant time points, onset time (black triangle), time of center of mass (black circle), and  
 699 duration (black horizontal line) were calculated.

700 (C) The auROC values for go-cue preferred neurons ( $n = 142$ , type I neurons). Each row  
701 corresponds to one neuron, with neurons in the left and right graphs in the same order. The neurons  
702 are sorted by the times of center of mass (white dots) of the auROC values calculated by go-cue  
703 odor presentation versus baseline. The color scale is as in (B). An arrow indicates the same neuron  
704 as in (B).

705 (D) Distributions of onset time, time of center of mass, and duration for significant excitations (top,  
706 red) and significant inhibitions (bottom, blue). Vertical dashed lines indicate median values.  
707 Statistical significance between excitations and inhibitions ( $*p < 0.05$ ,  $***p < 0.001$ ) was assessed  
708 by the Wilcoxon rank-sum test.

709 (E) Time course of excitation to go-cue odor and inhibition to no-go-cue odor. Purple dots,  
710 significant both go-cue excitation and no-go-cue inhibition ( $p < 0.01$ , permutation test); gray dots,  
711 other responses.

712

713

714

715

716

717

718

719

720

721

722

723

724

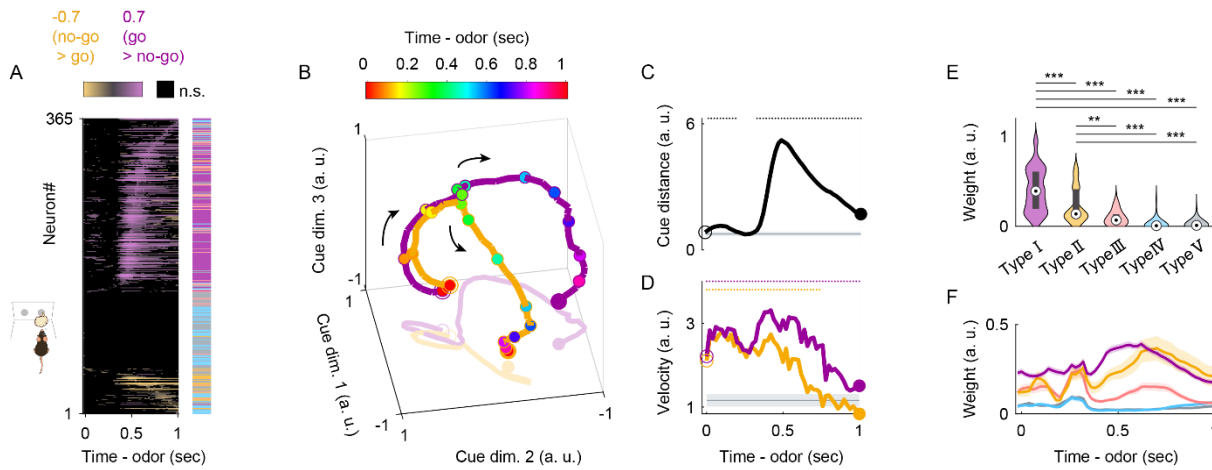

**Fig. 3. nLOT neuron population response before the initiation of odor-guided behaviors.**

(A) The auROC values (go-cue versus no-go-cue odor presentation, aligned by odor valve opening) for all neurons. Each row corresponds to one neuron. Neurons are sorted by the peak time for the auROC values. The color scale indicates significant preferences ( $p < 0.01$ , permutation test; positive values correspond to the go-cue preferred responses). The black boxes indicate bins with non-significant preferences ( $p > 0.01$ , permutation test). The colored box on the right shows the neuron type for each neuron (purple, type I; orange, type II; pink, type III; light blue, type IV; gray, type V).

(B) Visualization of the nLOT neuron population responses during odor-sampling epoch using principal component analysis ( $n = 365$  nLOT neurons). The responses to cue odors are projected onto the first three principal components corresponding to the odor-sampling epoch subspaces. Purple line, go-cue odor; orange line, no-go-cue odor. Temporal progression is depicted from unfilled purple/orange spheres to filled purple/orange spheres.

(C) The distance between nLOT neuron population responses. The gray line and shaded areas show the mean  $\pm 2$  standard deviation (SD) baseline values during the baseline epoch. Top dots indicate the time bins showing values more than mean + 2 SD baseline values.

(D) Rate of change (velocity) of nLOT neuron population responses. Purple line, go-cue odor; orange line, no-go-cue odor. The gray line and shaded areas show the mean  $\pm 2$  SD baseline values

744 during the baseline epoch. Top dots indicate the time bins showing values more than mean + 2 SD  
745 baseline values.

746 **(E)** Neural weights in the first dimension of the odor-sampling epoch subspaces. Box-Plots in  
747 violin-plots indicate medians and interquartile ranges. Purple, type I; orange, type II; pink, type III;  
748 light blue, type IV; gray, type V. The statistical significance among five groups (\*\*p < 0.01, \*\*\*p  
749 < 0.001) was assessed by a one-way analysis of variance (ANOVA) with Tukey's post hoc test.

750 **(F)** Neural weights along the time course in the first dimension of each sliding bin (width: 100 msec,  
751 step: 20 msec). The shaded areas represent  $\pm$  SEM. Purple, type I; orange, type II; pink, type III;  
752 light blue, type IV; gray, type V.

753

754

755

756

757

758

759

760

761

762

763

764

765

766

767



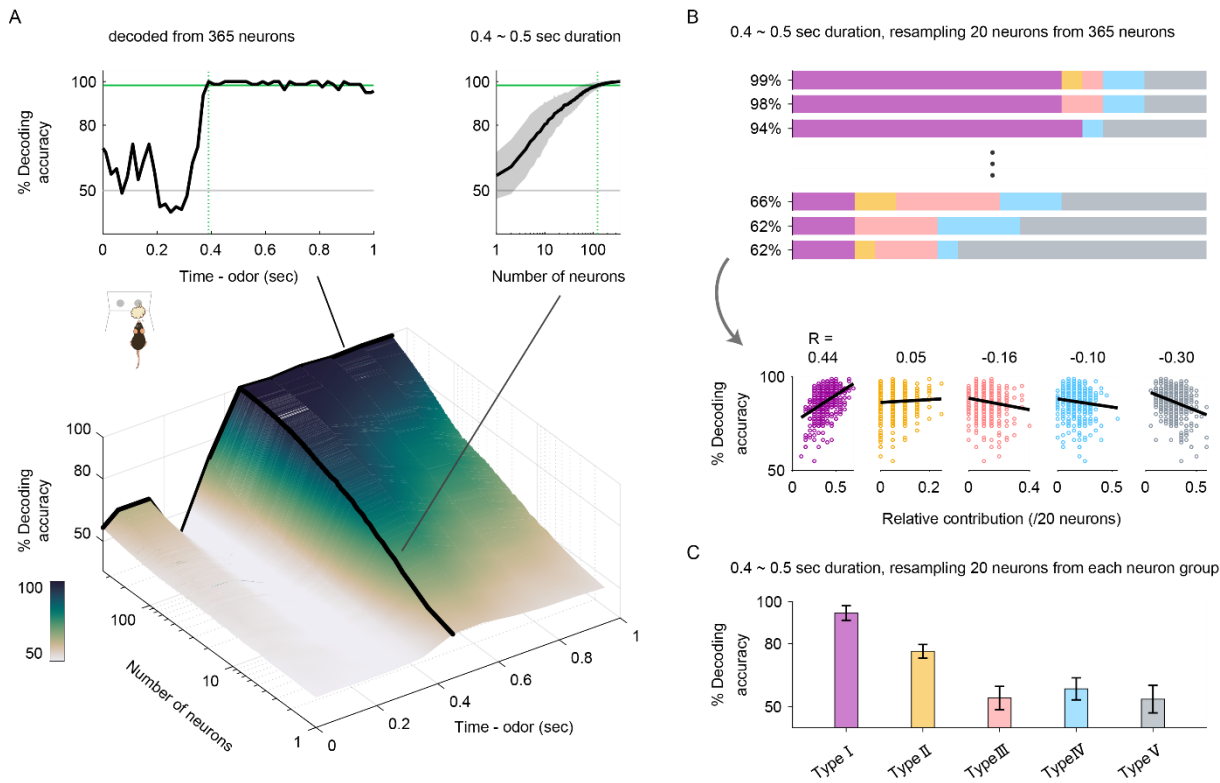

768

769

**Fig. 4. nLOT neurons provided sufficient information to account for behavioral choices.**

770

**(A)** The time course of odor decoding accuracy. A vector consisting of instantaneous spike counts

771

for 1–365 neurons in a sliding window (width, 100 msec; step, 20 msec) was used as an input for

772

the classifier. Training of the classifier and testing were performed at every time point. Green

773

horizontal lines indicate the level of animal behavioral performance. Gray horizontal lines indicate

774

the chance level (50%). Green vertical dashed lines indicate the first points wherein the decoding

775

accuracy reached the level of the animal behavioral performance. The areas with shading represent

776

$\pm$  SD.

777

**(B)** Decoding accuracies based on 20 randomly sampled neurons without replacement during the

778

400–500 msec period after the odor onset. Bottom, correlation between the decoding accuracy and

779

relative contribution as the proportion of each neuron type number in randomly sampled neurons.

780

Purple, type I; orange, type II; pink, type III; light blue, type IV; gray, type V.

781 (C) Decoding accuracies based on 20 randomly sampled neurons from each nLOT neuron group  
782 without replacement during the 400-500 msec period after the odor onset. The error bars represent  
783  $\pm$  SD. Purple, type I; orange, type II; pink, type III; light blue, type IV; gray, type V.

784

785

786

787

788

789

790

791

792

793

794

795

796

797

798

799

800

801

802

803

804

805

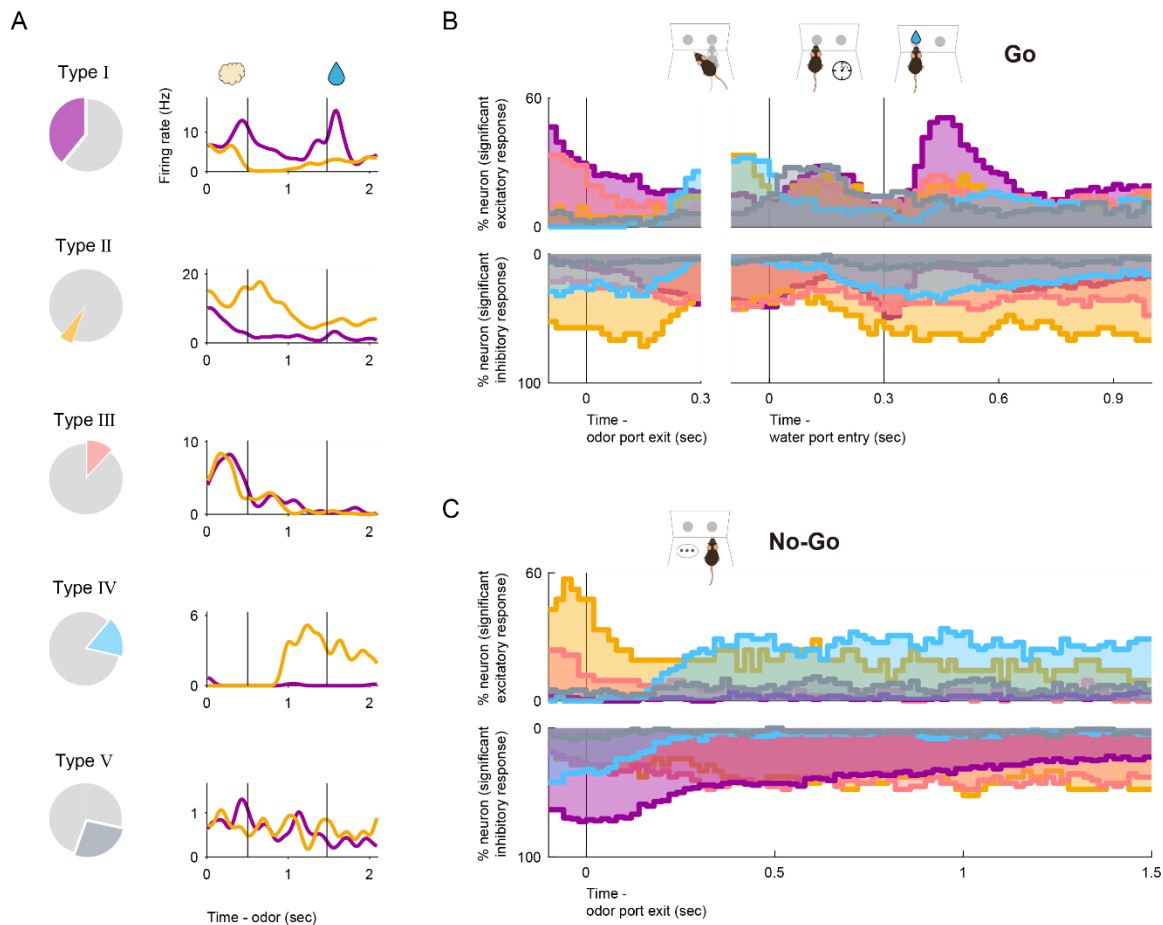

806

807

808 **Fig. 5. nLOT neurons exhibits bi-directional cue-outcome encoding following odor-guided**  
809 **behaviors**

810 (A) An example firing pattern of each neuron group following odor-guided behaviors. Event-  
811 aligned spike histograms are calculated using a 20 msec bin width and smoothed by convolving  
812 spike trains with a 60 msec wide Gaussian filter (purple line, go trial; orange line, no-go trial).  
813 Vertical black lines indicate the odor valve offset and the onset of the water reward.

814 (B) The proportions of neurons that exhibited significant responses were calculated from the  
815 auROC values ( $p < 0.01$ , permutation test) in go correct trials for each neuron group (top, excitation;  
816 bottom, inhibition). Vertical black lines indicate the odor port exit, water port entry, and the onset  
817 of the water reward. Purple, type I; orange, type II; pink, type III; light blue, type IV; gray, type V.

818 (C) Same as (B), for no-go correct trials.

819  
820  
821  
822  
823  
824  
825  
826  
827  
828  
829  
830  
831  
832  
833  
834  
835  
836  
837  
838  
839  
840  
841  
842  
843

844 **Supplementary Materials**

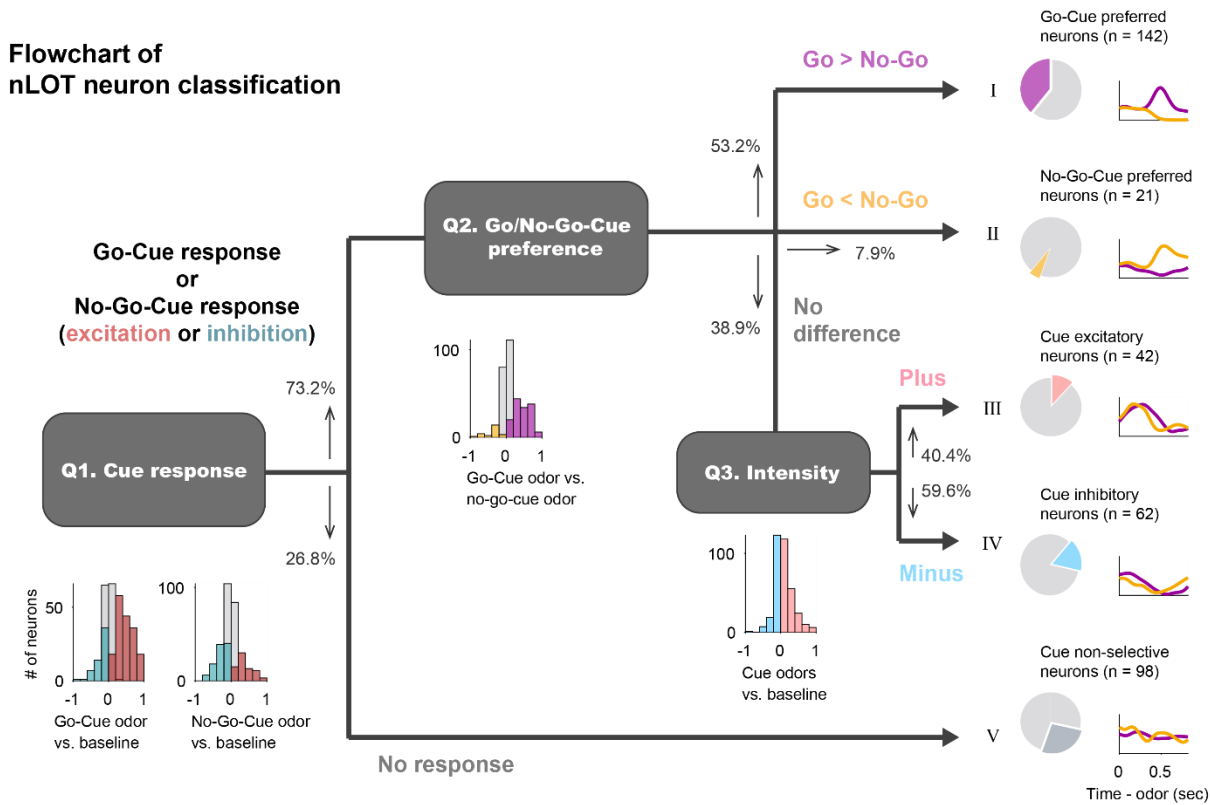

845

846

847 **Fig. S1. Flowchart of nucleus of the nLOT neuron classification.**

848 We classified the nLOT neurons into five types based on the response profiles of the odor-sampling  
 849 epoch. First (Q1), we calculated the area under the receiver operating characteristic curve (auROC)  
 850 values of go-cue versus baseline and no-go-cue versus baseline during the odor-sampling epoch in  
 851 the correct trials (red histogram, significant excitation; blue histogram, significant inhibition).  
 852 Based on these values, we defined the cue odor selective population (73.2%) that exhibited  
 853 significant responses for at least one of the cue odor presentations and cue odor non-selective  
 854 population (26.8%, type V neurons). Second (Q2), in the cue odor selective population, we also  
 855 calculated the auROC values of go-cue versus no-go-cue during the odor-sampling epoch in the  
 856 correct trials (purple histogram, significant go-cue > no-go-cue; orange histogram, significant go-  
 857 cue < no-go-cue). Based on these values, we defined go-cue preferred neurons (53.2%, type I  
 858 neurons) and no-go-cue preferred neurons (7.9%, type II neurons). Finally (Q3), in the remaining

859 population (38.9%), we calculated the auROC values of cue odors (go-cue + no-go-cue) versus  
860 baseline during the odor-sampling epoch in the correct trials (pink histogram, excitation; light blue  
861 histogram, inhibition). Based on these values, we defined cue excitatory neurons (40.4%, type III  
862 neurons) and cue inhibitory neurons (59.6%, type IV neurons). For all analyses above, we tested  
863 for significance at  $\alpha = 0.01$  (permutation test).

864

865

866

867

868

869

870

871

872

873

874

875

876

877

878

879

880

881

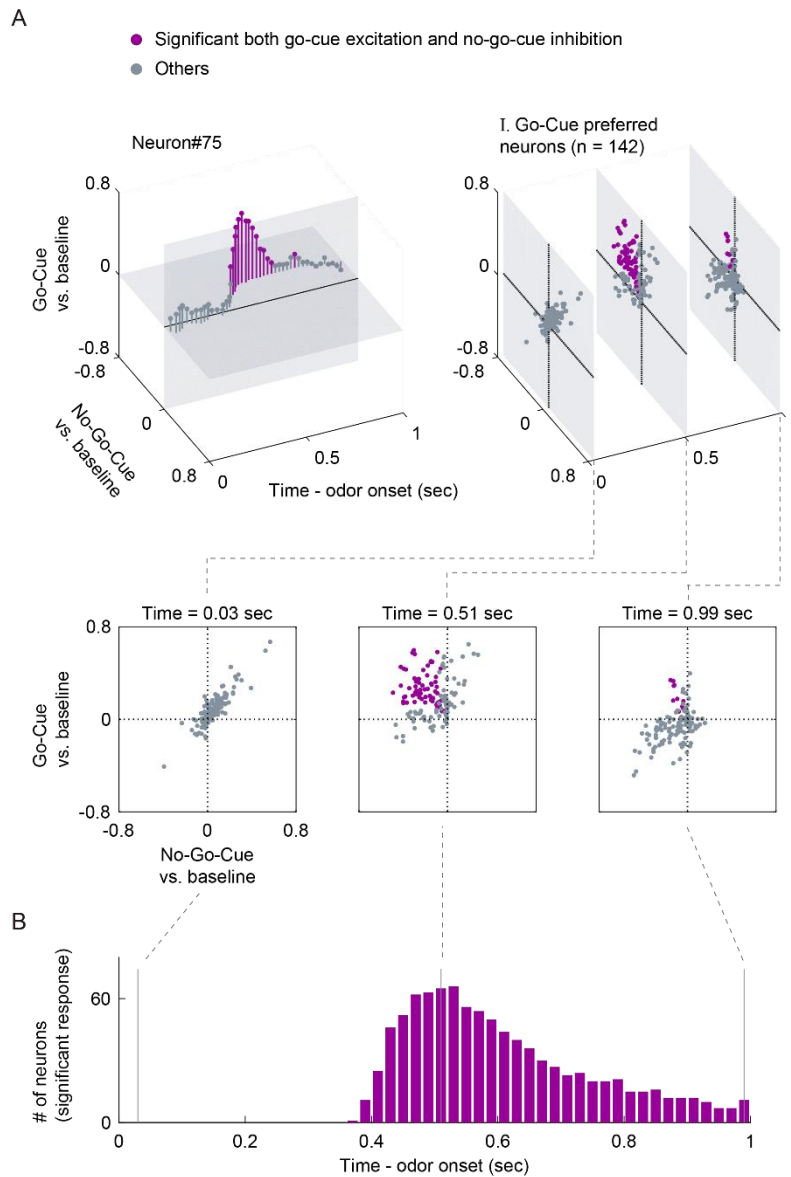

882

883 **Fig. S2. Evaluation of go-cue excitation and no-go-cue inhibition responses.**

884 (A) Time course of excitation to go-cue odor and inhibition to no-go-cue odor. Purple dots,  
885 significant both go-cue excitation and no-go-cue inhibition ( $p < 0.01$ , permutation test); gray dots,  
886 other responses.

887 (B) The number of neurons that exhibited significant responses calculated from the area under the  
888 auROC values ( $p < 0.01$ , permutation test).

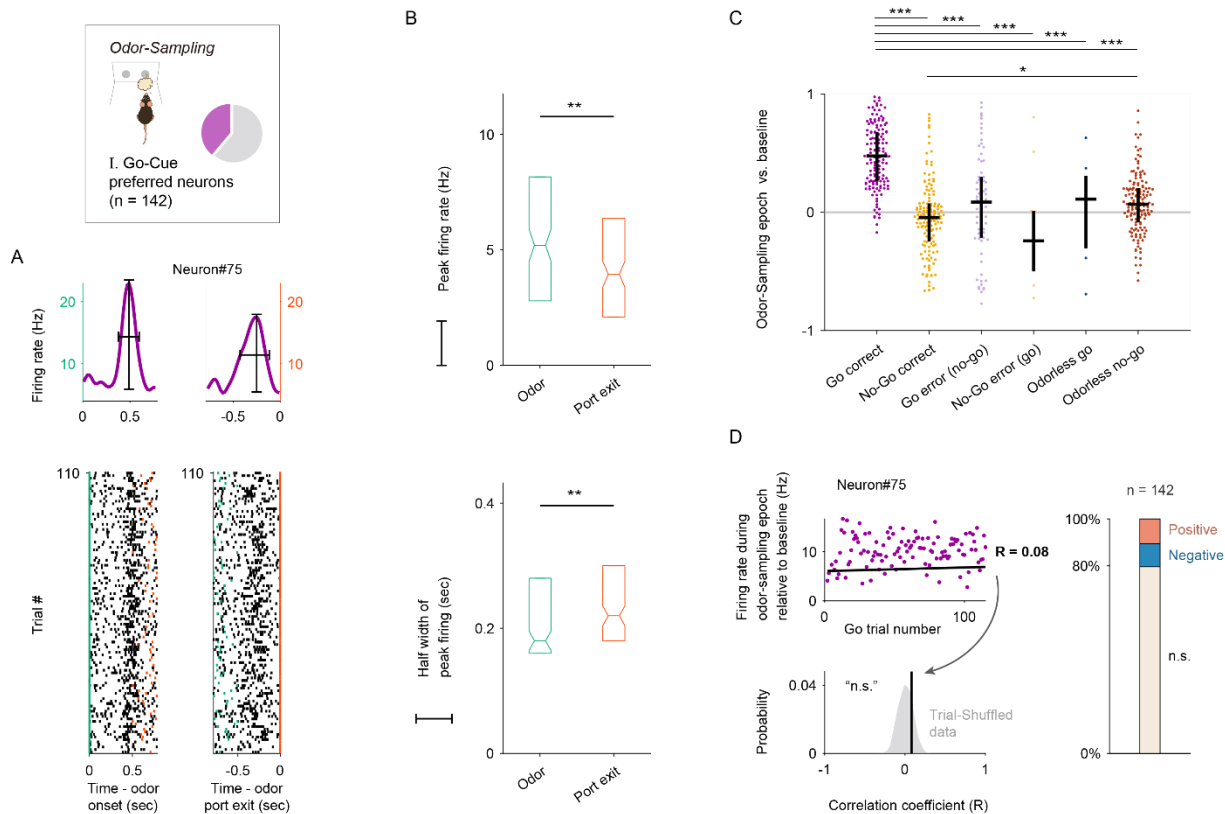

889

890

891 **Fig. S3. Go-Cue excitation response was triggered by odor onset rather than the initiation of**  
892 **an odor-guided behavior.**

893 (A) The activity of an example go-cue preferred neuron aligned to onset of odor valve opening (left,  
894 green ticks) or odor port exit (right, red ticks). Raster plots represent the neural activity with each  
895 row corresponding to a single trial from the start of the session (bottom) to the 110th trial (top), and  
896 each black tick mark to a spike. The peak firing rate (black vertical line) and temporal half width  
897 of the peak firing (black horizontal line) were defined from the spike histogram.

898 (B) Comparison of the peak firing rates (top) and half widths of the peak firings (bottom) between  
899 the two alignment conditions (odor valve opening versus odor port exit). The peak firing rates were  
900 higher when triggered by the odor valve opening ( $p < 10^{-15}$ , Wilcoxon signed-rank test). Half widths  
901 of the peak firings were longer when triggered by the odor port exit ( $p < 0.001$ , Wilcoxon signed-  
902 rank test).



903 (C) Go-cue excitation and no-go-cue inhibition responses during correct trials, error trials, and  
904 catch (odorless) trials. The auROC values were calculated during the odor-sampling epochs and  
905 only neurons with a minimum number of three trials for each analyzed condition were included in  
906 this analysis. Black horizontal lines and black vertical lines indicate medians and interquartile  
907 ranges. The statistical significance among six groups (\* $p < 0.05$ , \*\*\* $p < 0.001$ ) was assessed by  
908 one-way analysis of variance (ANOVA) with Tukey's post hoc test.

909 (D) The development of cue responses in go-cue preferred neurons during learning. For each go-  
910 cue preferred neuron, we calculated the correlation between the firing rate during the go-cue odor-  
911 sampling epoch relative to the baseline (a mean firing rate during inter trial interval was subtracted  
912 for each neuron) and the order of go trial from the start of the session. The correlation coefficient  
913 was compared with control values calculated by the 1000 trial-shuffled data (gray shaded area) and  
914 then the statistical significance was determined ( $< 0.5^{\text{th}}$  percentiles of the control values, negative  
915 correlation;  $> 99.5^{\text{th}}$  percentiles of the control values, positive correlation). Across go-cue preferred  
916 neurons, the majority of the go-cue responses were not correlated with trial progression (79.5%,  
917 not significant; 9.9%, negative; 10.6%, positive).

918

919

920

921

922

923

924

925

926

927

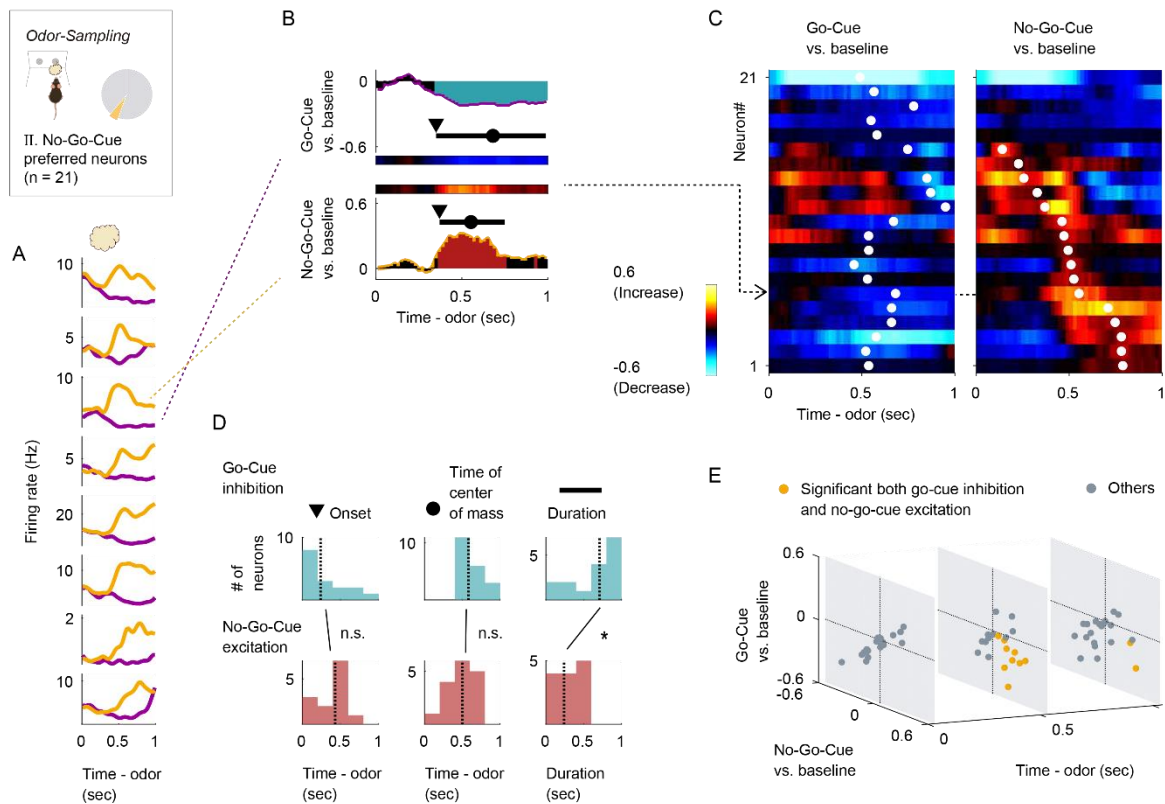

928

929

930 **Fig. S4. No-Go-Cue preferred neurons showed inhibition to go-cue odor and**  
 931 **go-cue odor.**

932 (A) Example firing patterns of no-go-cue preferred neurons during the odor-sampling epoch. Spike  
 933 histograms were calculated using a 20 msec bin width and smoothed by convolving the spike trains  
 934 with a 60 msec wide Gaussian filter (purple line, go-cue odor; orange line, no-go-cue odor).

935 (B) An example of the area under the auROC values for a no-go-cue preferred neuron. The auROC  
 936 values (aligned by odor valve opening) were calculated by go-cue odor presentation versus the  
 937 baseline (top) and no-go-cue odor presentation versus the baseline (bottom) in the sliding bins  
 938 (width, 100 msec; step, 20 msec). The red bars show significant excitation and blue bars show  
 939 significant inhibition ( $p < 0.01$ , permutation test). Based on the significant time points, the onset  
 940 times (black triangle), times of center of mass (black circle), and duration (black horizontal line)  
 941 were calculated.

942 (C) The auROC values for no-go-cue preferred neurons ( $n = 21$ , type II neurons). Each row  
943 corresponds to one neuron, with neurons in the left and right graphs in the same order. The neurons  
944 are sorted by the times of center of mass (white dots) of the auROC values calculated by no-go-cue  
945 odor presentation versus the baseline. The color scale is as in (B). An arrow indicates the same  
946 neuron as in (B).

947 (D) Distributions of onset time, times of center of mass, and duration for significant inhibitions (top,  
948 blue) and significant excitations (bottom, red). Vertical dashed lines indicate the median values.  
949 Statistical significance between excitations and inhibitions ( $*p < 0.05$ ) was assessed by the  
950 Wilcoxon rank-sum test.

951 (E) Time course of inhibition to go-cue odor and excitation to no-go-cue odor. Orange dots,  
952 significant both no-go-cue inhibition and go-cue excitation ( $p < 0.01$ , permutation test); gray dots,  
953 other responses.

954

955

956

957

958

959

960

961

962

963

964

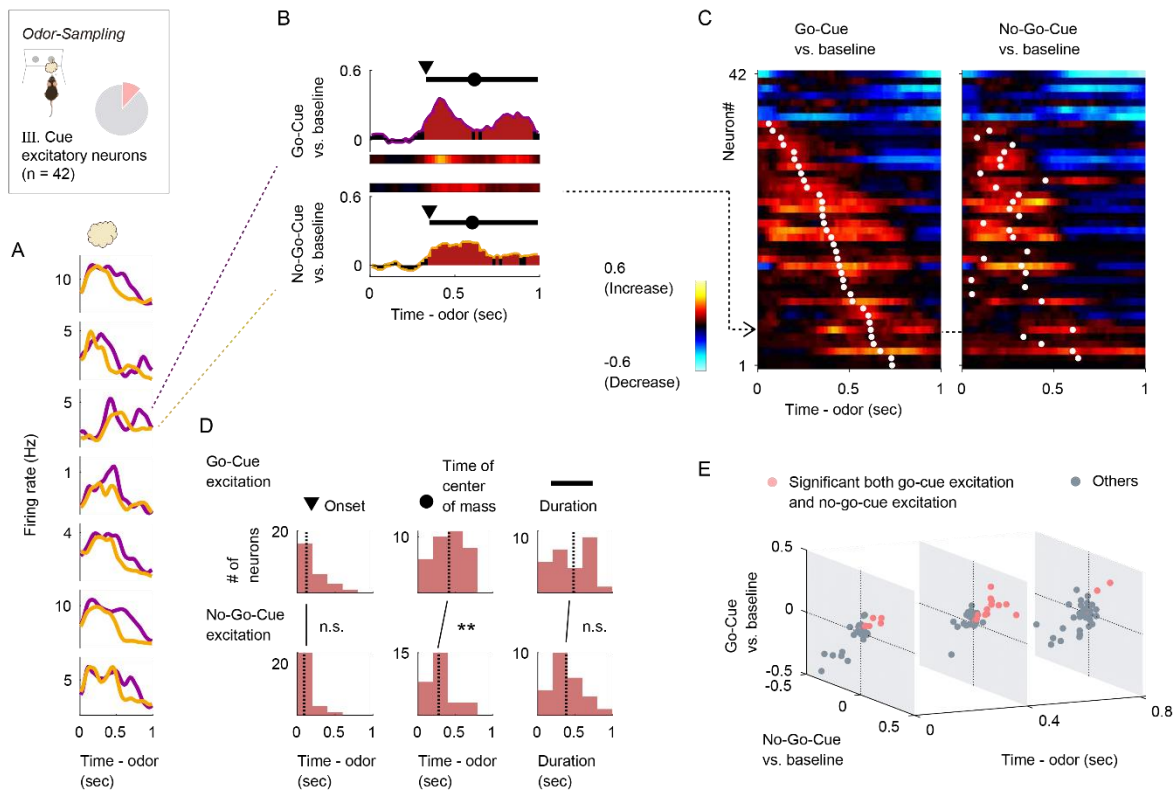

965

966

967 **Fig. S5. Cue excitatory neuron activity patterns.**

968 (A) Example firing patterns of cue excitatory neurons during the odor-sampling epoch. Spike  
969 histograms are calculated using a 20 msec bin width and smoothed by convolving spike trains with  
970 a 60 msec wide Gaussian filter (purple line, go-cue odor; orange line, no-go-cue odor).

971 (B) An example of the auROC values for a cue excitatory neuron. The auROC values (aligned by  
972 odor valve opening) were calculated by go-cue odor presentation versus the baseline (top) and no-  
973 go-cue odor presentation versus baseline (bottom) in the sliding bins (width, 100 msec; step, 20  
974 msec). Red bars show significant excitation ( $p < 0.01$ , permutation test). Based on the significant  
975 time points, onset times (black triangle), times of center of mass (black circle), and duration (black  
976 horizontal line) were calculated.

977 (C) The auROC values for cue excitatory neurons (n = 42, type III neurons). Each row corresponds  
978 to one neuron, with neurons in the left and right graphs in the same order. Neurons are sorted by

979 times of center of mass (white dots) of the auROC values calculated by go-cue odor presentation  
980 versus the baseline. The color scale is as in (B). An arrow indicates the same neuron as in (B).

981 **(D)** Distributions of onset times, times of center of mass, and duration of for significant excitations.  
982 Vertical dashed lines indicate median values. Statistical significance between cue odors (\*\* $p <$   
983 0.01) was assessed by the Wilcoxon rank-sum test.

984 **(E)** The time course of excitation to go-cue odor and excitation to no-go-cue odor. Pink dots,  
985 significant both go-cue excitation and no-go-cue excitation ( $p < 0.01$ , permutation test); gray dots,  
986 other responses.

987

988

989

990

991

992

993

994

995

996

997

998

999

1000

1001

1002

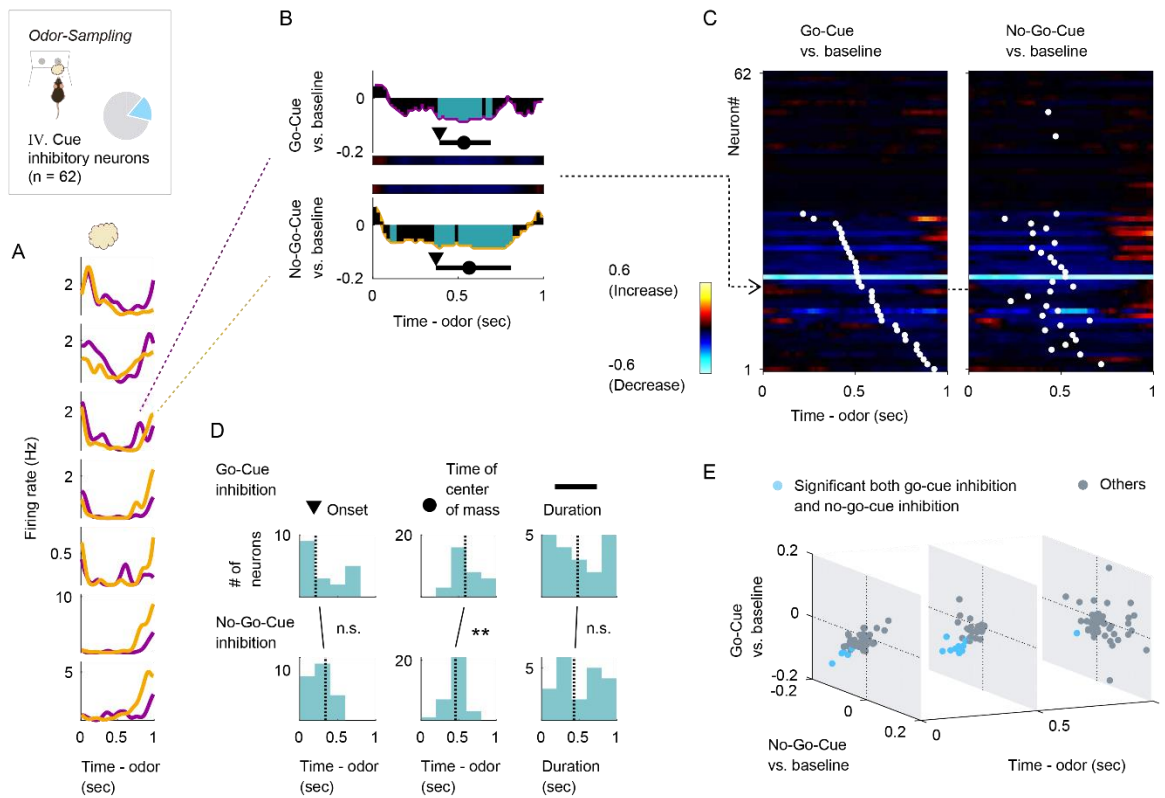

1003

1004

1005 **Fig. S6. Cue inhibitory neuron activity patterns.**

1006 (A) Example firing patterns of cue inhibitory neurons during the odor-sampling epoch. Spike  
1007 histograms are calculated using a 20 msec bin width and smoothed by convolving spike trains with  
1008 a 60 msec wide Gaussian filter (purple line, go-cue odor; orange line, no-go-cue odor).

1009 (B) An example of the auROC values for a cue inhibitory neuron. The auROC values (aligned by  
1010 odor valve opening) were calculated by go-cue odor presentation versus the baseline (top) and no-  
1011 go-cue odor presentation versus the baseline (bottom) in the sliding bins (width, 100 msec; step, 20  
1012 msec). Blue bars show significant inhibition ( $p < 0.01$ , permutation test). Based on the significant  
1013 time points, onset times (black triangle), times of center of mass (black circle), and duration (black  
1014 horizontal line) were calculated.

1015 (C) The auROC values for cue inhibitory neurons (n = 62, type IV neurons). Each row corresponds  
1016 to one neuron, with neurons in the left and right graphs in the same order. The neurons are sorted

1017 by the times of center of mass (white dots) of the auROC values calculated by go-cue odor  
1018 presentation versus the baseline. The color scale is as in (B). An arrow indicates the same neuron  
1019 as in (B).

1020 **(D)** Distributions of onset time, times of center of mass, and duration for significant inhibitions.  
1021 The vertical dashed lines indicate the median values. The statistical significance between cue odors  
1022 (\*\* $p < 0.01$ ) was assessed by the Wilcoxon rank-sum test.

1023 **(E)** Time course of inhibition to go-cue odor and inhibition to no-go-cue odor. Light blue dots,  
1024 significant both go-cue inhibition and no-go-cue inhibition ( $p < 0.01$ , permutation test); gray dots,  
1025 other responses.

1026

1027

1028

1029

1030

1031

1032

1033

1034

1035

1036

1037

1038

1039

1040

1041

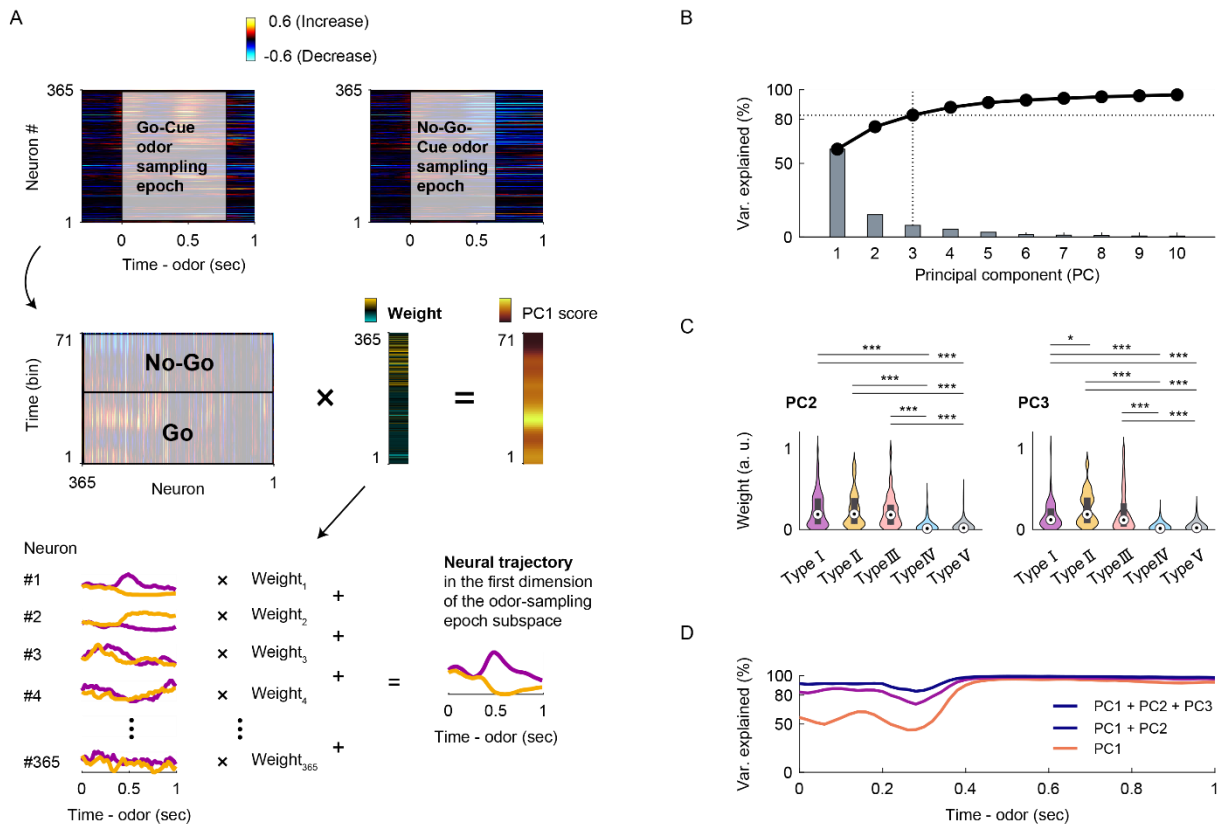

**Fig. S7. Population vector construction and analyses for the nLOT neuron population response.**

(A) Population vector construction. We constructed the two conditions (71 time bins)  $\times$  365 neurons matrix during the odor-sampling epoch, in which the columns contained the auROC values corresponding to the trial-averaged firing rate changes from the baseline. By performing principal component analysis (PCA) on the dataset, we reduced the dimensionality of the nLOT population from 365 neurons to three principal components (PCs). Subsequently, we obtained the odor-sampling epoch subspaces and neural weights (graphs show the values of the first dimension of the odor-sampling epoch subspaces).

(B) Scree plot of the odor-sampling epoch subspaces. It is notable that we used the three subspaces because they explained 82.8% of the total variance.

(C) Neural weights in the second (left) and third (right) dimension of the odor-sampling epoch subspaces. Box-plots in violin-plots indicate the medians and interquartile ranges. Purple, type I;



1057 orange, type II; pink, type III; light blue, type IV; gray, type V. Statistical significance among five  
1058 groups (\* $p < 0.05$ , \*\*\* $p < 0.001$ ) was assessed by one-way analysis of variance (ANOVA) with  
1059 Tukey's post hoc test.

1060 **(D)** Variances of neural weights data along the time course (Fig. 3F) in the dimensions of each  
1061 sliding bin (width: 100 msec, step: 20 msec).

1062

1063

1064

1065

1066

1067

1068

1069

1070

1071

1072

1073

1074

1075

1076

1077

1078

1079

1080

1081

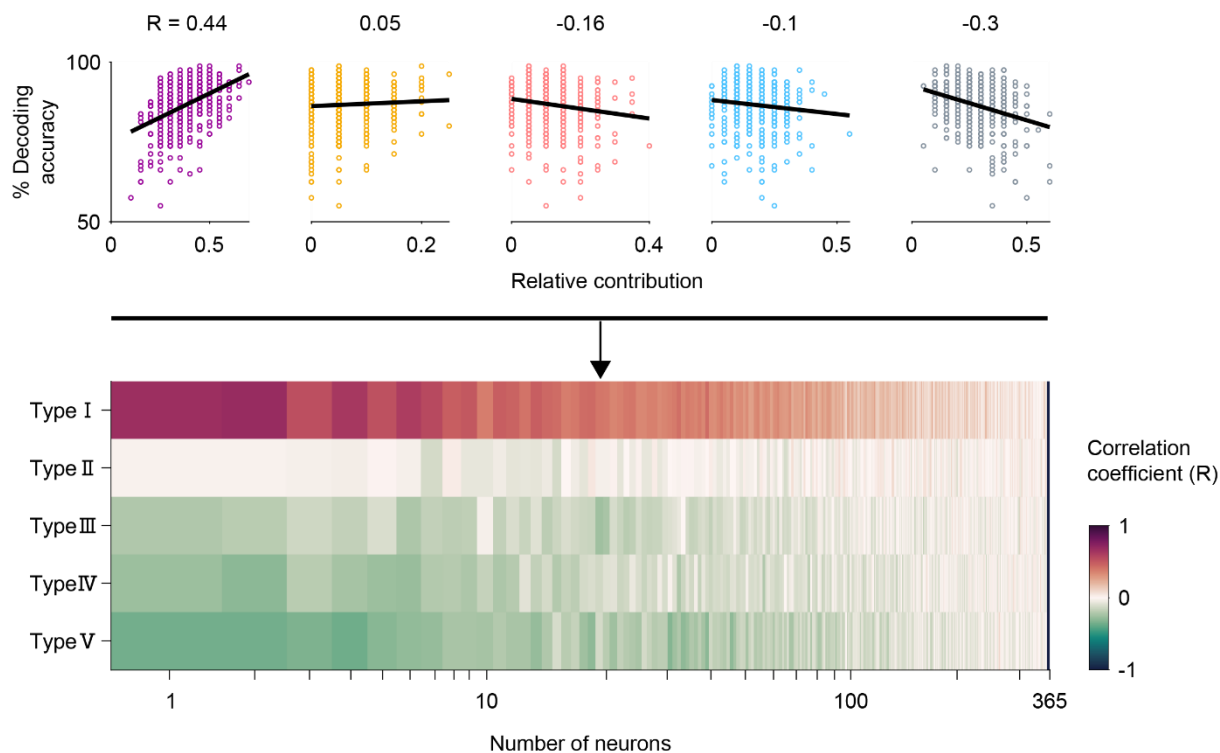

1082

1083

1084 **Fig. S8. Decoding accuracies based on 1–364 randomly sampled neurons during the 400–500**  
1085 **msec period after the odor onset.**

1086 Correlations between the decoding accuracies and relative contributions as the proportion of each  
1087 neuron type number in randomly sampled neurons. The decoding accuracies based on 1–364  
1088 randomly sampled neurons without replacement during the 400–500 msec period after the odor  
1089 onset.

1090

1091

1092

1093

1094

1095

1096

1097

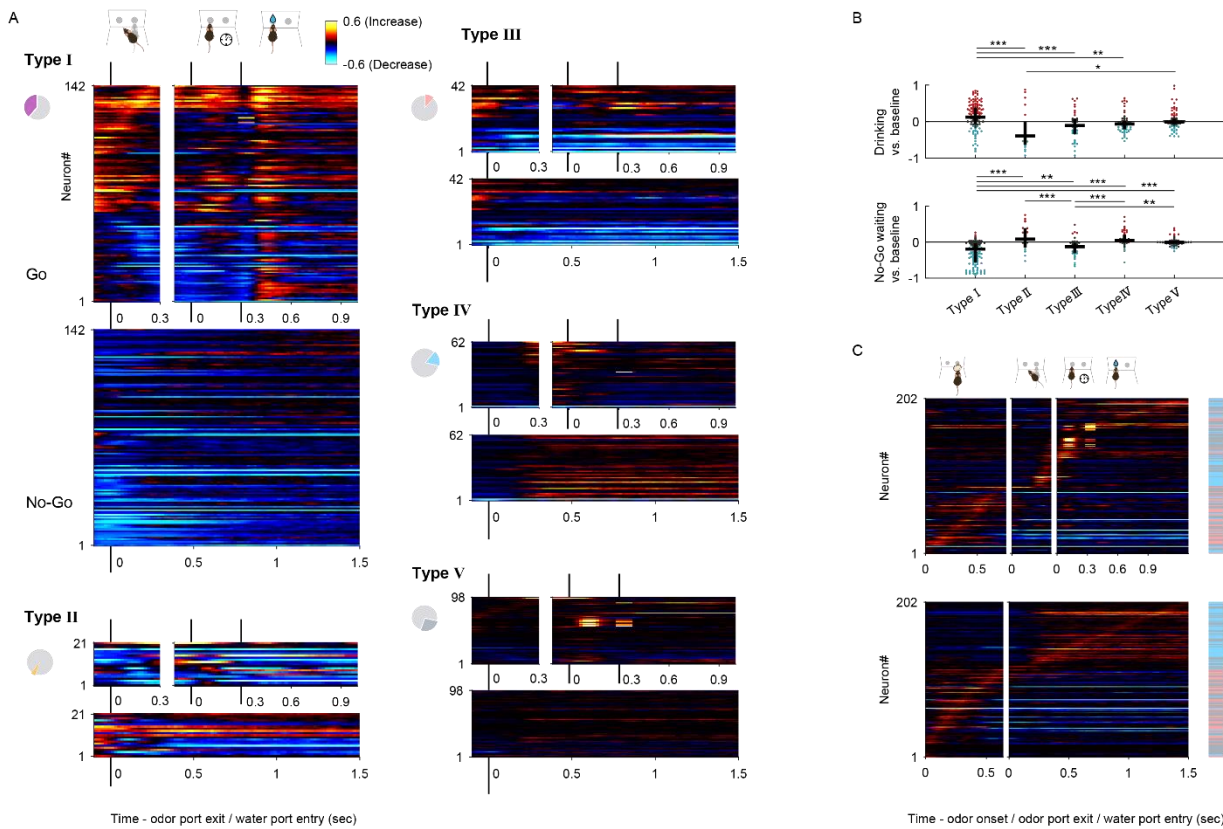

1098

1099

1100 **Fig. S9. Response profiles following odor-guided behaviors.**

1101 (A) The auROC values calculated by go or no-go trials versus the baseline in the sliding bins (width,  
 1102 100 msec; step, 20 msec) following odor-guided behaviors. Each row corresponds to one neuron,  
 1103 with neurons in all the graphs in the same order for each neuron group. Neurons were sorted by the  
 1104 peak time for the auROC values. The color scale is as in Fig. 2C.

1105 (B) The auROC values during the drinking epoch (top) and no-go waiting epoch (bottom). Black  
 1106 horizontal lines and black vertical lines indicate the medians and interquartile ranges. Red dots,  
 1107 significant excitation; blue dots, significant inhibition; gray dots, non-significant ( $p < 0.01$ ,  
 1108 permutation test). Statistical significance among five groups (\* $p < 0.05$ , \*\* $p < 0.01$ , \*\*\* $p < 0.001$ )  
 1109 was assessed by one-way analysis of variance (ANOVA) with Tukey's post hoc test.

1110 (C) The auROC values calculated by go or no-go trials versus the baseline in the sliding bins (width,  
 1111 100 msec; step, 20 msec) during odor-guided go/no-go task in the type III, IV, and V neurons. Each  
 1112 row corresponds to one neuron. Neurons are sorted by the peak time for the auROC values. The

1113 color scale is as in Fig. 2C. The colored box on the right shows neuron type for each neuron (pink,  
1114 type III; light blue, type IV; gray, type V). Note that these neurons tended to show an excitatory  
1115 response to a specific behavioral epoch with inhibitory responses relative to other behavioral epochs.

1116

1117

1118

1119

1120

1121

1122

1123

1124

1125

1126

1127

1128

1129

1130

1131

1132

1133

1134

1135

1136

1137

1138 **Table**

1139 **Table 1. The distribution of types of nucleus of the lateral olfactory tract neurons**

| Mouse   | I. Go-Cue preferred neurons | II. No-Go-Cue preferred neurons | III. Cue excitatory neurons | IV. Cue inhibitory neurons | V. Cue non-selective neurons | (Total) |
|---------|-----------------------------|---------------------------------|-----------------------------|----------------------------|------------------------------|---------|
| #1      | 8                           | 5                               | 10                          | 21                         | 28                           | 72      |
| #2      | 8                           | 4                               | 3                           | 9                          | 16                           | 40      |
| #3      | 22                          | 5                               | 12                          | 31                         | 31                           | 101     |
| #4      | 104                         | 7                               | 17                          | 1                          | 23                           | 152     |
| (Total) | 142                         | 21                              | 42                          | 62                         | 98                           | 365     |

1140

1141

1142
